# Supplementary material
Source: PubMed Central journal article supplement (PMC6143077)
Supplement: jamacardiol-3-693-s001.pdf [file jamacardiol-3-693-s001.pdf]

## Supplementary Online Content

Said MA, Verweij N, van der Harst P. Associations of combined genetic and lifestyle risks with incident cardiovascular disease and diabetes in the UK Biobank study. *JAMA Cardiol*. Published online June 27, 2018. doi:10.1001/jamacardio.2018.1717

**eMethods.** Behavioral lifestyle factor definitions in the UK Biobank study

**eTable 1.** Single-nucleotide polymorphisms used to build the genetic risk score for coronary artery disease

**eTable 2.** Single-nucleotide polymorphisms used to build the genetic risk score for atrial fibrillation

**eTable 3.** Single-nucleotide polymorphisms used to build the genetic risk score for stroke

**eTable 4.** Single-nucleotide polymorphisms used to build the genetic risk score for hypertension (based on systolic blood pressure)

**eTable 5.** Single-nucleotide polymorphisms used to build the genetic risk score for type 2 diabetes

**eTable 6.** Diet component definitions used in the UK Biobank study

**eTable 7.** Disease definitions used in the UK Biobank study

**eTable 8.** Baseline characteristics per lifestyle category and genetic risk group of coronary artery disease

**eTable 9.** Baseline characteristics per lifestyle category and genetic risk group of atrial fibrillation

**eTable 10.** Baseline characteristics per lifestyle category and genetic risk group of stroke

**eTable 11.** Baseline characteristics per lifestyle category and genetic risk group of hypertension

**eTable 12.** Baseline characteristics per lifestyle category and genetic risk group of type 2 diabetes

**eTable 13.** Genetic risk of cardiovascular diseases and diabetes

**eTable 14.** Associations of individual lifestyle factors with cardiovascular diseases and diabetes across genetic risk groups

**eTable 15.** Genetic and lifestyle risk of hypertension in individuals with baseline systolic blood pressure less than 130 mm Hg and/or diastolic blood pressure less than 80 mm Hg

**eTable 16.** Genetic and lifestyle risk of cardiovascular diseases and diabetes in equally sized tertiles of genetic risk

**eTable 17.** Correlations between individual lifestyle factors and covariates

**eTable 18.** Genetic risk × lifestyle interactions

**eTable 19.** Minimal detectable interaction effect between genetic risk × lifestyle

**eTable 20.** Population-attributable fraction per behavioral lifestyle group

**eFigure 1.** Risk of incident hypertension in individuals with baseline systolic blood pressure less than 130 mm Hg and/or diastolic blood pressure less than 80 mm Hg

**eFigure 2.** Risk of incident coronary artery disease associated with genetic risk and lifestyle stratified by sex

**eFigure 3.** Risk of incident atrial fibrillation associated with genetic risk and lifestyle stratified by sex

**eFigure 4.** Risk of incident stroke associated with genetic risk and lifestyle stratified by sex

**eFigure 5.** Risk of incident hypertension associated with genetic risk and lifestyle stratified by sex

**eFigure 6.** Risk of incident diabetes associated with genetic risk and lifestyle stratified by sex

**eReferences.**

This supplementary material has been provided by the authors to give readers additional information about their work.

## **eMethods.** Behavioral lifestyle factor definitions in the UK Biobank study

Smoking behavior was defined as ideal if participants had never smoked or stopped more than 12 months ago, intermediate if they had stopped within the last 12 months, or as poor if they were current smokers. Body mass index (BMI) ( $\text{kg}/\text{m}^2$ ) was calculated for all participants by UK Biobank based on their measured weight and height. Ideal BMI was defined as  $\text{BMI} < 25$  and  $\geq 18.5 \text{ kg}/\text{m}^2$ , thereby excluding participants with underweight according to the World Health Organization definition ( $N=1,745$ )<sup>1</sup>. Intermediate BMI was defined as  $\text{BMI} \geq 25$  and  $< 30 \text{ kg}/\text{m}^2$ , poor BMI as  $\geq 30 \text{ kg}/\text{m}^2$ . Physical activity was defined as ideal if participants had  $\geq 150$  min/wk moderate or  $\geq 75$  min/wk vigorous or 150 min/wk mixed (moderate + vigorous) activity. Intermediate physical activity was defined as 1–149 min/wk moderate or 1–74 min/wk vigorous or 1–149 min/wk mixed activity, and poor physical activity was defined as not performing any moderate or vigorous activity. Duration and intensity of physical activity was ascertained using the answers provided by participants on a range of questions based on the validated International Physical Activity Questionnaire<sup>2</sup>. Similar to a previous study<sup>3</sup>, diet was defined as ideal or poor using a more recent definition of ideal intake of healthy and unhealthy dietary components for cardiovascular health<sup>4</sup> than the one used in the American Heart Association guidelines<sup>5</sup>. Ideal diet was defined as adequate intake of at least half of the following dietary components: increased consumption of fruits, vegetables, whole grains, (shell)fish, dairy products and vegetable oils; and reduced or no consumption of refined grains, (un)processed meats and sugar-sweetened beverages.

**eTable 1.** Single-nucleotide polymorphisms used to build the genetic risk score for coronary artery disease

| SNP rsID   | Chr. | hg19 position | NEFAL | EFAL | EF Frequency | Beta    | Standard Error | P value  | Study, year (PMID)                   | Comment |
|------------|------|---------------|-------|------|--------------|---------|----------------|----------|--------------------------------------|---------|
| rs2843152  | 1    | 2245570       | C     | G    | 0.6865       | -0.0781 | 0.0129         | 1.54E-09 | Nikpay <i>et al.</i> 2015 (26343387) |         |
| rs35465346 | 1    | 22132518      | A     | G    | 0.8414       | 0.0662  | 0.0141         | 2.88E-06 | Nikpay <i>et al.</i> 2015 (26343387) |         |
| rs28470722 | 1    | 38386727      | A     | G    | 0.5913       | -0.0495 | 0.0101         | 9.86E-07 | Nikpay <i>et al.</i> 2015 (26343387) |         |
| rs11206510 | 1    | 55496039      | C     | T    | 0.8476       | 0.0745  | 0.0133         | 2.35E-08 | Nikpay <i>et al.</i> 2015 (26343387) |         |
| rs9970807  | 1    | 56965664      | T     | C    | 0.9151       | 0.133   | 0.0168         | 2.12E-15 | Nikpay <i>et al.</i> 2015 (26343387) |         |
| rs61772626 | 1    | 57015668      | G     | A    | 0.8796       | -0.0752 | 0.0148         | 3.76E-07 | Nikpay <i>et al.</i> 2015 (26343387) |         |
| rs7528419  | 1    | 109817192     | G     | A    | 0.7858       | 0.0826  | 0.0151         | 4.88E-08 | Nikpay <i>et al.</i> 2015 (26343387) |         |
| rs1277930  | 1    | 109822143     | G     | A    | 0.7373       | 0.0736  | 0.016          | 4.08E-06 | Nikpay <i>et al.</i> 2015 (26343387) |         |
| rs11810571 | 1    | 151762308     | C     | G    | 0.7872       | 0.0592  | 0.0116         | 3.16E-07 | Nikpay <i>et al.</i> 2015 (26343387) |         |
| rs6689306  | 1    | 154395946     | A     | G    | 0.5525       | -0.056  | 0.0094         | 2.61E-09 | Nikpay <i>et al.</i> 2015 (26343387) |         |
| rs72702224 | 1    | 154911689     | A     | G    | 0.5985       | -0.0796 | 0.0114         | 3.11E-12 | Nikpay <i>et al.</i> 2015 (26343387) |         |
| rs3738591  | 1    | 155764808     | G     | C    | 0.8806       | 0.1199  | 0.0191         | 3.75E-10 | Nikpay <i>et al.</i> 2015 (26343387) |         |
| rs2789422  | 1    | 159892088     | A     | G    | 0.6084       | 0.0473  | 0.01           | 2.46E-06 | Nikpay <i>et al.</i> 2015 (26343387) |         |
| rs2820315  | 1    | 201872264     | T     | C    | 0.7163       | -0.0467 | 0.0103         | 6.09E-06 | Nikpay <i>et al.</i> 2015 (26343387) |         |
| rs67180937 | 1    | 222823743     | T     | G    | 0.6631       | 0.0944  | 0.0116         | 3.37E-16 | Nikpay <i>et al.</i> 2015 (26343387) |         |
| rs75082168 | 1    | 223132028     | A     | T    | 0.9622       | -0.1501 | 0.0328         | 4.75E-06 | Nikpay <i>et al.</i> 2015 (26343387) |         |
| rs16986953 | 2    | 19942473      | A     | G    | 0.8953       | -0.0852 | 0.015          | 1.45E-08 | Nikpay <i>et al.</i> 2015 (26343387) |         |
| rs13420649 | 2    | 43463637      | C     | T    | 0.7863       | -0.0761 | 0.0134         | 1.30E-08 | Nikpay <i>et al.</i> 2015            |         |

| SNP rsID    | Chr. | hg19 position | NEFAL | EFAL | EF Frequency | Beta    | Standard Error | P value  | Study, year (PMID)                   | Comment               |
|-------------|------|---------------|-------|------|--------------|---------|----------------|----------|--------------------------------------|-----------------------|
|             |      |               |       |      |              |         |                |          | (26343387)                           |                       |
| rs11126366  | 2    | 72554292      | G     | C    | 0.8054       | 0.0894  | 0.0158         | 1.50E-08 | Nikpay <i>et al.</i> 2015 (26343387) |                       |
| rs11126387  | 2    | 73167944      | T     | C    | 0.4543       | 0.0676  | 0.0127         | 1.00E-07 | Nikpay <i>et al.</i> 2015 (26343387) |                       |
| rs7568458   | 2    | 85788175      | A     | T    | 0.5515       | -0.0596 | 0.0095         | 3.64E-10 | Nikpay <i>et al.</i> 2015 (26343387) |                       |
| rs11898671  | 2    | 144159905     | C     | A    | 0.8144       | 0.0552  | 0.0123         | 6.77E-06 | Nikpay <i>et al.</i> 2015 (26343387) |                       |
| rs7564469   | 2    | 145258445     | C     | T    | 0.7965       | -0.0582 | 0.0124         | 2.71E-06 | Nikpay <i>et al.</i> 2015 (26343387) |                       |
| rs17678683  | 2    | 145286559     | G     | T    | 0.9123       | -0.0905 | 0.0167         | 6.20E-08 | Nikpay <i>et al.</i> 2015 (26343387) |                       |
| rs2252654   | 2    | 145801113     | A     | G    | 0.6943       | -0.0492 | 0.0103         | 2.01E-06 | Nikpay <i>et al.</i> 2015 (26343387) |                       |
| rs57759964  | 2    | 148410756     | G     | A    | 0.7474       | -0.0582 | 0.0129         | 6.60E-06 | Nikpay <i>et al.</i> 2015 (26343387) | Missing in UK Biobank |
| rs33998987  | 2    | 163284067     | C     | T    | 0.6496       | 0.0563  | 0.0111         | 3.79E-07 | Nikpay <i>et al.</i> 2015 (26343387) |                       |
| rs12619842  | 2    | 164945044     | C     | G    | 0.8142       | 0.0604  | 0.0126         | 1.67E-06 | Nikpay <i>et al.</i> 2015 (26343387) |                       |
| rs7559543   | 2    | 202799924     | T     | C    | 0.8212       | -0.0642 | 0.0135         | 2.16E-06 | Nikpay <i>et al.</i> 2015 (26343387) |                       |
| rs3732355   | 2    | 216245392     | T     | C    | 0.7388       | 0.0595  | 0.0121         | 8.60E-07 | Nikpay <i>et al.</i> 2015 (26343387) |                       |
| rs17517928  | 2    | 216291359     | T     | C    | 0.7421       | 0.0804  | 0.0123         | 7.63E-11 | Nikpay <i>et al.</i> 2015 (26343387) |                       |
| rs2552527   | 2    | 218688596     | G     | T    | 0.5937       | 0.0512  | 0.0097         | 1.31E-07 | Nikpay <i>et al.</i> 2015 (26343387) |                       |
| rs10168194  | 2    | 228986980     | C     | G    | 0.6528       | -0.0476 | 0.0099         | 1.51E-06 | Nikpay <i>et al.</i> 2015 (26343387) |                       |
| rs143803699 | 2    | 236902252     | G     | C    | 0.979        | -0.1518 | 0.0325         | 2.90E-06 | Nikpay <i>et al.</i> 2015 (26343387) |                       |
| rs748431    | 3    | 14928077      | G     | T    | 0.5937       | -0.049  | 0.0094         | 2.14E-07 | Nikpay <i>et al.</i> 2015 (26343387) |                       |
| rs7623687   | 3    | 49448566      | C     | A    | 0.859        | 0.0693  | 0.0139         | 6.53E-07 | Nikpay <i>et al.</i> 2015 (26343387) |                       |

| SNP rsID    | Chr. | hg19 position | NEFAL | EFAL | EF Frequency | Beta    | Standard Error | P value  | Study, year (PMID)                   | Comment               |
|-------------|------|---------------|-------|------|--------------|---------|----------------|----------|--------------------------------------|-----------------------|
| rs142695226 | 3    | 124475201     | G     | T    | 0.8636       | -0.0659 | 0.0135         | 1.10E-06 | Nikpay <i>et al.</i> 2015 (26343387) | Missing in UK Biobank |
| rs73222236  | 3    | 135888642     | G     | A    | 0.6752       | -0.0725 | 0.0108         | 1.70E-11 | Nikpay <i>et al.</i> 2015 (26343387) |                       |
| rs433903    | 3    | 153980130     | A     | G    | 0.8572       | 0.0682  | 0.0147         | 3.67E-06 | Nikpay <i>et al.</i> 2015 (26343387) | Missing in UK Biobank |
| rs1873197   | 4    | 38911595      | A     | G    | 0.9203       | 0.1103  | 0.0187         | 3.64E-09 | Nikpay <i>et al.</i> 2015 (26343387) |                       |
| rs17087335  | 4    | 57838583      | T     | G    | 0.7854       | -0.0608 | 0.0111         | 4.60E-08 | Nikpay <i>et al.</i> 2015 (26343387) |                       |
| rs10857147  | 4    | 81181072      | T     | A    | 0.7309       | -0.0546 | 0.0109         | 5.84E-07 | Nikpay <i>et al.</i> 2015 (26343387) |                       |
| rs17626479  | 4    | 119129455     | A     | C    | 0.8893       | 0.0744  | 0.0162         | 4.51E-06 | Nikpay <i>et al.</i> 2015 (26343387) |                       |
| rs11723436  | 4    | 120901336     | G     | A    | 0.6945       | -0.0641 | 0.0105         | 8.54E-10 | Nikpay <i>et al.</i> 2015 (26343387) |                       |
| rs35879803  | 4    | 146782837     | A     | C    | 0.7016       | 0.0478  | 0.0104         | 4.75E-06 | Nikpay <i>et al.</i> 2015 (26343387) |                       |
| rs4593108   | 4    | 148281001     | G     | C    | 0.7953       | 0.0966  | 0.0121         | 1.83E-15 | Nikpay <i>et al.</i> 2015 (26343387) |                       |
| rs6842241   | 4    | 148400819     | A     | C    | 0.8335       | -0.0878 | 0.0128         | 5.63E-12 | Nikpay <i>et al.</i> 2015 (26343387) |                       |
| rs13140296  | 4    | 156408950     | A     | G    | 0.529        | 0.0625  | 0.0105         | 2.22E-09 | Nikpay <i>et al.</i> 2015 (26343387) |                       |
| rs1001037   | 4    | 156513518     | C     | T    | 0.8495       | 0.073   | 0.0136         | 7.72E-08 | Nikpay <i>et al.</i> 2015 (26343387) |                       |
| rs72685791  | 4    | 156620217     | A     | G    | 0.797        | 0.076   | 0.0117         | 9.81E-11 | Nikpay <i>et al.</i> 2015 (26343387) |                       |
| rs10071096  | 5    | 4012694       | A     | G    | 0.7052       | 0.0485  | 0.0102         | 2.07E-06 | Nikpay <i>et al.</i> 2015 (26343387) |                       |
| rs6876322   | 5    | 53361427      | C     | T    | 0.8244       | -0.0633 | 0.0126         | 5.31E-07 | Nikpay <i>et al.</i> 2015 (26343387) | Missing in UK Biobank |
| rs288187    | 5    | 107344426     | T     | C    | 0.8242       | 0.074   | 0.0129         | 1.10E-08 | Nikpay <i>et al.</i> 2015 (26343387) |                       |
| rs11240980  | 5    | 107975671     | A     | G    | 0.7017       | -0.0519 | 0.0108         | 1.41E-06 | Nikpay <i>et al.</i> 2015 (26343387) |                       |
| rs421329    | 6    | 5090056       | T     | C    | 0.7647       | 0.0698  | 0.0125         | 2.43E-08 | Nikpay <i>et al.</i> 2015            |                       |

| SNP rsID   | Chr. | hg19 position | NEFAL | EFAL | EF Frequency | Beta    | Standard Error | P value  | Study, year (PMID)                      | Comment |
|------------|------|---------------|-------|------|--------------|---------|----------------|----------|-----------------------------------------|---------|
|            |      |               |       |      |              |         |                |          | (26343387)                              |         |
| rs9349379  | 6    | 12903957      | G     | A    | 0.5684       | -0.1768 | 0.0108         | 0.00E+00 | Nikpay <i>et al.</i> 2015<br>(26343387) |         |
| rs2876643  | 6    | 22591525      | A     | C    | 0.6789       | -0.0509 | 0.0099         | 2.63E-07 | Nikpay <i>et al.</i> 2015<br>(26343387) |         |
| rs9379774  | 6    | 25597043      | T     | A    | 0.841        | -0.0569 | 0.0125         | 5.61E-06 | Nikpay <i>et al.</i> 2015<br>(26343387) |         |
| rs4472337  | 6    | 34769765      | T     | C    | 0.8507       | -0.0735 | 0.0143         | 2.47E-07 | Nikpay <i>et al.</i> 2015<br>(26343387) |         |
| rs4321818  | 6    | 35709880      | T     | C    | 0.5105       | -0.0446 | 0.0096         | 3.47E-06 | Nikpay <i>et al.</i> 2015<br>(26343387) |         |
| rs57349798 | 6    | 37486052      | A     | G    | 0.624        | 0.0603  | 0.0106         | 1.27E-08 | Nikpay <i>et al.</i> 2015<br>(26343387) |         |
| rs56336142 | 6    | 39134099      | C     | T    | 0.8073       | 0.0668  | 0.0119         | 1.85E-08 | Nikpay <i>et al.</i> 2015<br>(26343387) |         |
| rs194937   | 6    | 82442022      | A     | G    | 0.8367       | -0.06   | 0.0123         | 1.11E-06 | Nikpay <i>et al.</i> 2015<br>(26343387) |         |
| rs9486719  | 6    | 97060124      | A     | G    | 0.7998       | 0.0564  | 0.0116         | 1.10E-06 | Nikpay <i>et al.</i> 2015<br>(26343387) |         |
| rs1591805  | 6    | 126717064     | A     | G    | 0.5208       | -0.0828 | 0.0141         | 4.53E-09 | Nikpay <i>et al.</i> 2015<br>(26343387) |         |
| rs12202017 | 6    | 134173151     | G     | A    | 0.7          | 0.0637  | 0.01           | 1.80E-10 | Nikpay <i>et al.</i> 2015<br>(26343387) |         |
| rs2327433  | 6    | 134214227     | G     | A    | 0.8649       | -0.0737 | 0.0148         | 6.08E-07 | Nikpay <i>et al.</i> 2015<br>(26343387) |         |
| rs2153219  | 6    | 149755695     | G     | A    | 0.8141       | 0.0854  | 0.0135         | 2.73E-10 | Nikpay <i>et al.</i> 2015<br>(26343387) |         |
| rs57938011 | 6    | 149964105     | A     | T    | 0.6283       | -0.0509 | 0.011          | 3.37E-06 | Nikpay <i>et al.</i> 2015<br>(26343387) |         |
| rs9364537  | 6    | 160258733     | G     | A    | 0.6751       | -0.0909 | 0.0115         | 2.63E-15 | Nikpay <i>et al.</i> 2015<br>(26343387) |         |
| rs6932293  | 6    | 160535878     | C     | T    | 0.9629       | -0.2164 | 0.0467         | 3.59E-06 | Nikpay <i>et al.</i> 2015<br>(26343387) |         |
| rs624249   | 6    | 160679400     | A     | C    | 0.6313       | 0.0647  | 0.0112         | 8.49E-09 | Nikpay <i>et al.</i> 2015<br>(26343387) |         |
| rs9457927  | 6    | 160910282     | G     | A    | 0.9813       | -0.4265 | 0.0422         | 4.77E-24 | Nikpay <i>et al.</i> 2015<br>(26343387) |         |

| SNP rsID    | Chr. | hg19 position | NEFAL | EFAL | EF Frequency | Beta    | Standard Error | P value  | Study, year (PMID)                   | Comment               |
|-------------|------|---------------|-------|------|--------------|---------|----------------|----------|--------------------------------------|-----------------------|
| rs55730499  | 6    | 161005610     | T     | C    | 0.9438       | -0.1885 | 0.0326         | 7.67E-09 | Nikpay <i>et al.</i> 2015 (26343387) |                       |
| rs12201989  | 6    | 161075021     | T     | A    | 0.8314       | 0.0823  | 0.0169         | 1.14E-06 | Nikpay <i>et al.</i> 2015 (26343387) | Missing in UK Biobank |
| rs56393506  | 6    | 161089307     | T     | C    | 0.8391       | -0.1197 | 0.016          | 6.77E-14 | Nikpay <i>et al.</i> 2015 (26343387) |                       |
| rs1998043   | 6    | 161097871     | G     | A    | 0.8422       | -0.0885 | 0.0149         | 3.19E-09 | Nikpay <i>et al.</i> 2015 (26343387) |                       |
| rs6935921   | 6    | 161108536     | C     | T    | 0.6512       | 0.0696  | 0.011          | 2.48E-10 | Nikpay <i>et al.</i> 2015 (26343387) |                       |
| rs186696265 | 6    | 161111700     | T     | C    | 0.9869       | -0.3539 | 0.0513         | 5.47E-12 | Nikpay <i>et al.</i> 2015 (26343387) |                       |
| rs75176946  | 6    | 161178140     | T     | C    | 0.9871       | -0.2367 | 0.0508         | 3.21E-06 | Nikpay <i>et al.</i> 2015 (26343387) |                       |
| rs112215831 | 6    | 161182037     | A     | G    | 0.8962       | 0.0956  | 0.0191         | 6.00E-07 | Nikpay <i>et al.</i> 2015 (26343387) | Missing in UK Biobank |
| rs2107595   | 7    | 19049388      | A     | G    | 0.7995       | -0.0734 | 0.0113         | 8.08E-11 | Nikpay <i>et al.</i> 2015 (26343387) |                       |
| rs4719608   | 7    | 20292134      | A     | G    | 0.714        | -0.0544 | 0.0105         | 2.42E-07 | Nikpay <i>et al.</i> 2015 (26343387) |                       |
| rs68170813  | 7    | 107259721     | C     | T    | 0.7803       | 0.0522  | 0.0115         | 6.26E-06 | Nikpay <i>et al.</i> 2015 (26343387) |                       |
| rs11556924  | 7    | 129663496     | T     | C    | 0.6867       | 0.0726  | 0.0111         | 5.37E-11 | Nikpay <i>et al.</i> 2015 (26343387) |                       |
| rs3735352   | 7    | 139724555     | GT    | C    | 0.7604       | 0.0581  | 0.0114         | 3.24E-07 | Nikpay <i>et al.</i> 2015 (26343387) |                       |
| rs3918226   | 7    | 150690176     | T     | C    | 0.9355       | -0.1333 | 0.0221         | 1.70E-09 | Nikpay <i>et al.</i> 2015 (26343387) |                       |
| rs17411031  | 8    | 19852310      | G     | C    | 0.7446       | 0.053   | 0.0109         | 1.17E-06 | Nikpay <i>et al.</i> 2015 (26343387) |                       |
| rs113756303 | 8    | 26102772      | T     | G    | 0.8161       | -0.0742 | 0.0139         | 1.02E-07 | Nikpay <i>et al.</i> 2015 (26343387) |                       |
| rs367948    | 8    | 26435116      | G     | C    | 0.7486       | 0.0553  | 0.0116         | 2.01E-06 | Nikpay <i>et al.</i> 2015 (26343387) | Missing in UK Biobank |
| rs56307388  | 8    | 26855424      | A     | C    | 0.7999       | 0.0553  | 0.012          | 3.98E-06 | Nikpay <i>et al.</i> 2015 (26343387) |                       |
| rs2001846   | 8    | 126478450     | T     | C    | 0.5198       | -0.0461 | 0.0092         | 5.94E-07 | Nikpay <i>et al.</i> 2015            |                       |



| SNP rsID   | Chr. | hg19 position | NEFAL | EFAL | EF Frequency | Beta    | Standard Error | P value  | Study, year (PMID)                      | Comment |
|------------|------|---------------|-------|------|--------------|---------|----------------|----------|-----------------------------------------|---------|
|            |      |               |       |      |              |         |                |          | (26343387)                              |         |
| rs13301437 | 9    | 21155973      | C     | T    | 0.8596       | -0.0802 | 0.0166         | 1.37E-06 | Nikpay <i>et al.</i> 2015<br>(26343387) |         |
| rs7855162  | 9    | 22074793      | T     | C    | 0.0389       | 0.1592  | 0.0271         | 4.17E-09 | Nikpay <i>et al.</i> 2015<br>(26343387) |         |
| rs1970112  | 9    | 22085598      | C     | T    | 0.5142       | -0.1236 | 0.0128         | 4.50E-22 | Nikpay <i>et al.</i> 2015<br>(26343387) |         |
| rs62555370 | 9    | 22102437      | A     | G    | 0.8781       | 0.0926  | 0.0178         | 1.99E-07 | Nikpay <i>et al.</i> 2015<br>(26343387) |         |
| rs1333046  | 9    | 22124123      | A     | T    | 0.5013       | -0.1203 | 0.0123         | 1.41E-22 | Nikpay <i>et al.</i> 2015<br>(26343387) |         |
| rs75657982 | 9    | 118826916     | A     | G    | 0.9768       | -0.1756 | 0.037          | 2.07E-06 | Nikpay <i>et al.</i> 2015<br>(26343387) |         |
| rs10818576 | 9    | 124412948     | G     | T    | 0.7489       | -0.0547 | 0.011          | 7.25E-07 | Nikpay <i>et al.</i> 2015<br>(26343387) |         |
| rs2519093  | 9    | 136141870     | T     | C    | 0.8091       | -0.0797 | 0.0118         | 1.19E-11 | Nikpay <i>et al.</i> 2015<br>(26343387) |         |
| rs7917431  | 10   | 30287398      | T     | C    | 0.66         | 0.0504  | 0.0104         | 1.24E-06 | Nikpay <i>et al.</i> 2015<br>(26343387) |         |
| rs2487928  | 10   | 30323892      | A     | G    | 0.5818       | -0.0618 | 0.0095         | 7.83E-11 | Nikpay <i>et al.</i> 2015<br>(26343387) |         |
| rs58030109 | 10   | 43377793      | A     | G    | 0.9802       | -0.1699 | 0.0365         | 3.14E-06 | Nikpay <i>et al.</i> 2015<br>(26343387) |         |
| rs11238720 | 10   | 44313122      | G     | C    | 0.8694       | -0.1029 | 0.0171         | 1.71E-09 | Nikpay <i>et al.</i> 2015<br>(26343387) |         |
| rs1870634  | 10   | 44480811      | T     | G    | 0.6375       | 0.0733  | 0.0101         | 4.68E-13 | Nikpay <i>et al.</i> 2015<br>(26343387) |         |
| rs1746050  | 10   | 44777188      | A     | C    | 0.8497       | 0.1185  | 0.0147         | 6.38E-16 | Nikpay <i>et al.</i> 2015<br>(26343387) |         |
| rs7901016  | 10   | 74637326      | C     | T    | 0.906        | 0.0984  | 0.0175         | 1.90E-08 | Nikpay <i>et al.</i> 2015<br>(26343387) |         |
| rs7082705  | 10   | 82170856      | A     | G    | 0.7101       | -0.0552 | 0.0109         | 3.96E-07 | Nikpay <i>et al.</i> 2015<br>(26343387) |         |
| rs17680741 | 10   | 82251514      | C     | T    | 0.7166       | 0.0474  | 0.0103         | 4.47E-06 | Nikpay <i>et al.</i> 2015<br>(26343387) |         |
| rs1412444  | 10   | 91002927      | T     | C    | 0.6309       | -0.0668 | 0.0097         | 5.18E-12 | Nikpay <i>et al.</i> 2015<br>(26343387) |         |

| SNP rsID   | Chr. | hg19 position | NEFAL | EFAL | EF Frequency | Beta    | Standard Error | P value  | Study, year (PMID)                   | Comment |
|------------|------|---------------|-------|------|--------------|---------|----------------|----------|--------------------------------------|---------|
| rs11191416 | 10   | 104604916     | G     | T    | 0.8725       | 0.0894  | 0.0137         | 5.97E-11 | Nikpay <i>et al.</i> 2015 (26343387) |         |
| rs11813268 | 10   | 105682296     | T     | C    | 0.8257       | 0.0684  | 0.013          | 1.38E-07 | Nikpay <i>et al.</i> 2015 (26343387) |         |
| rs4627080  | 11   | 9336349       | G     | T    | 0.8978       | -0.0708 | 0.015          | 2.40E-06 | Nikpay <i>et al.</i> 2015 (26343387) |         |
| rs10840293 | 11   | 9751196       | G     | A    | 0.5498       | 0.0564  | 0.0096         | 4.74E-09 | Nikpay <i>et al.</i> 2015 (26343387) |         |
| rs1351525  | 11   | 13301548      | A     | T    | 0.6745       | 0.0484  | 0.01           | 1.27E-06 | Nikpay <i>et al.</i> 2015 (26343387) |         |
| rs12801636 | 11   | 65391317      | A     | G    | 0.7594       | 0.0499  | 0.011          | 5.21E-06 | Nikpay <i>et al.</i> 2015 (26343387) |         |
| rs2128739  | 11   | 103673277     | A     | C    | 0.6765       | -0.0642 | 0.0101         | 1.75E-10 | Nikpay <i>et al.</i> 2015 (26343387) |         |
| rs10841443 | 12   | 20220033      | C     | G    | 0.6648       | 0.0507  | 0.0101         | 5.82E-07 | Nikpay <i>et al.</i> 2015 (26343387) |         |
| rs12826942 | 12   | 42796300      | G     | A    | 0.7625       | -0.0517 | 0.011          | 2.62E-06 | Nikpay <i>et al.</i> 2015 (26343387) |         |
| rs3858602  | 12   | 54177548      | G     | A    | 0.8804       | 0.0677  | 0.0147         | 3.97E-06 | Nikpay <i>et al.</i> 2015 (26343387) |         |
| rs11170820 | 12   | 54513915      | G     | C    | 0.9237       | -0.1038 | 0.0198         | 1.62E-07 | Nikpay <i>et al.</i> 2015 (26343387) |         |
| rs808919   | 12   | 56647911      | G     | C    | 0.8871       | 0.1085  | 0.0203         | 8.93E-08 | Nikpay <i>et al.</i> 2015 (26343387) |         |
| rs11172113 | 12   | 57527283      | C     | T    | 0.6017       | -0.0436 | 0.0096         | 6.28E-06 | Nikpay <i>et al.</i> 2015 (26343387) |         |
| rs11174220 | 12   | 62285075      | T     | A    | 0.8159       | -0.0924 | 0.0153         | 1.68E-09 | Nikpay <i>et al.</i> 2015 (26343387) |         |
| rs2681472  | 12   | 90008959      | G     | A    | 0.7987       | -0.0741 | 0.0113         | 6.20E-11 | Nikpay <i>et al.</i> 2015 (26343387) |         |
| rs7967514  | 12   | 111835545     | G     | A    | 0.0603       | 0.126   | 0.0258         | 1.03E-06 | Nikpay <i>et al.</i> 2015 (26343387) |         |
| rs4766578  | 12   | 111904371     | T     | A    | 0.567        | -0.0904 | 0.0116         | 7.39E-15 | Nikpay <i>et al.</i> 2015 (26343387) |         |
| rs2244608  | 12   | 121416988     | G     | A    | 0.6515       | -0.0476 | 0.0097         | 1.02E-06 | Nikpay <i>et al.</i> 2015 (26343387) |         |
| rs10846744 | 12   | 125312425     | C     | G    | 0.7953       | -0.0721 | 0.0135         | 8.88E-08 | Nikpay <i>et al.</i> 2015            |         |

| SNP rsID   | Chr. | hg19 position | NEFAL | EFAL | EF Frequency | Beta    | Standard Error | P value  | Study, year (PMID)                      | Comment |
|------------|------|---------------|-------|------|--------------|---------|----------------|----------|-----------------------------------------|---------|
|            |      |               |       |      |              |         |                |          | (26343387)                              |         |
| rs7973725  | 12   | 125441159     | C     | T    | 0.923        | 0.1029  | 0.0213         | 1.35E-06 | Nikpay <i>et al.</i> 2015<br>(26343387) |         |
| rs1924981  | 13   | 29022645      | T     | C    | 0.6586       | -0.0501 | 0.01           | 5.11E-07 | Nikpay <i>et al.</i> 2015<br>(26343387) |         |
| rs9591012  | 13   | 33058333      | A     | G    | 0.6785       | 0.0457  | 0.0102         | 7.14E-06 | Nikpay <i>et al.</i> 2015<br>(26343387) |         |
| rs9532984  | 13   | 42634693      | A     | G    | 0.575        | 0.0561  | 0.0098         | 9.12E-09 | Nikpay <i>et al.</i> 2015<br>(26343387) |         |
| rs11617955 | 13   | 110818102     | A     | T    | 0.8936       | 0.0985  | 0.0163         | 1.39E-09 | Nikpay <i>et al.</i> 2015<br>(26343387) |         |
| rs4773141  | 13   | 110954353     | G     | C    | 0.6408       | -0.075  | 0.0118         | 1.78E-10 | Nikpay <i>et al.</i> 2015<br>(26343387) |         |
| rs11838776 | 13   | 111040681     | A     | G    | 0.7367       | -0.0743 | 0.0115         | 8.86E-11 | Nikpay <i>et al.</i> 2015<br>(26343387) |         |
| rs9515203  | 13   | 111049623     | C     | T    | 0.7606       | 0.0671  | 0.0117         | 1.08E-08 | Nikpay <i>et al.</i> 2015<br>(26343387) |         |
| rs34905765 | 13   | 111100780     | T     | C    | 0.8982       | -0.0807 | 0.0162         | 6.41E-07 | Nikpay <i>et al.</i> 2015<br>(26343387) |         |
| rs56003851 | 13   | 111114176     | A     | C    | 0.8035       | 0.0849  | 0.0133         | 1.97E-10 | Nikpay <i>et al.</i> 2015<br>(26343387) |         |
| rs61969072 | 13   | 111380701     | G     | T    | 0.8267       | -0.0584 | 0.0125         | 2.87E-06 | Nikpay <i>et al.</i> 2015<br>(26343387) |         |
| rs10139550 | 14   | 100145710     | G     | C    | 0.577        | -0.0554 | 0.0098         | 1.38E-08 | Nikpay <i>et al.</i> 2015<br>(26343387) |         |
| rs56062135 | 15   | 67455630      | T     | C    | 0.7943       | 0.0697  | 0.0119         | 4.54E-09 | Nikpay <i>et al.</i> 2015<br>(26343387) |         |
| rs11635330 | 15   | 78687353      | C     | T    | 0.4011       | -0.0497 | 0.0097         | 3.30E-07 | Nikpay <i>et al.</i> 2015<br>(26343387) |         |
| rs4887109  | 15   | 79074294      | T     | C    | 0.6758       | 0.082   | 0.0125         | 4.46E-11 | Nikpay <i>et al.</i> 2015<br>(26343387) |         |
| rs4468572  | 15   | 79124475      | T     | C    | 0.5858       | 0.057   | 0.0101         | 1.67E-08 | Nikpay <i>et al.</i> 2015<br>(26343387) |         |
| rs8042271  | 15   | 89574218      | G     | A    | 0.0977       | -0.0967 | 0.0176         | 3.69E-08 | Nikpay <i>et al.</i> 2015<br>(26343387) |         |
| rs2521501  | 15   | 91437388      | T     | A    | 0.6975       | -0.0599 | 0.011          | 5.03E-08 | Nikpay <i>et al.</i> 2015<br>(26343387) |         |

| SNP rsID   | Chr. | hg19 position | NEFAL | EFAL | EF Frequency | Beta    | Standard Error | P value  | Study, year (PMID)                   | Comment               |
|------------|------|---------------|-------|------|--------------|---------|----------------|----------|--------------------------------------|-----------------------|
| rs17581137 | 15   | 96146414      | C     | A    | 0.7589       | 0.0514  | 0.0109         | 2.24E-06 | Nikpay <i>et al.</i> 2015 (26343387) |                       |
| rs12899265 | 15   | 99219598      | C     | T    | 0.8331       | -0.0695 | 0.0143         | 1.14E-06 | Nikpay <i>et al.</i> 2015 (26343387) |                       |
| rs7500448  | 16   | 83045790      | G     | A    | 0.7725       | 0.0555  | 0.0117         | 2.11E-06 | Nikpay <i>et al.</i> 2015 (26343387) |                       |
| rs9914266  | 17   | 2133250       | C     | T    | 0.6456       | -0.0485 | 0.0096         | 4.57E-07 | Nikpay <i>et al.</i> 2015 (26343387) | Missing in UK Biobank |
| rs72823056 | 17   | 40565926      | G     | T    | 0.8408       | -0.0659 | 0.0128         | 2.90E-07 | Nikpay <i>et al.</i> 2015 (26343387) |                       |
| rs12600562 | 17   | 44977040      | T     | G    | 0.39         | 0.0471  | 0.0098         | 1.67E-06 | Nikpay <i>et al.</i> 2015 (26343387) |                       |
| rs35895680 | 17   | 47060322      | A     | C    | 0.7159       | 0.0679  | 0.0113         | 2.17E-09 | Nikpay <i>et al.</i> 2015 (26343387) |                       |
| rs12940887 | 17   | 47402807      | T     | C    | 0.6759       | -0.0562 | 0.0104         | 5.72E-08 | Nikpay <i>et al.</i> 2015 (26343387) |                       |
| rs7212798  | 17   | 59013488      | C     | T    | 0.8535       | -0.1006 | 0.0148         | 9.51E-12 | Nikpay <i>et al.</i> 2015 (26343387) | Missing in UK Biobank |
| rs2270114  | 17   | 59478776      | C     | G    | 0.3511       | -0.0574 | 0.011          | 2.01E-07 | Nikpay <i>et al.</i> 2015 (26343387) |                       |
| rs3760128  | 17   | 73886888      | G     | A    | 0.6594       | 0.0558  | 0.0103         | 5.83E-08 | Nikpay <i>et al.</i> 2015 (26343387) |                       |
| rs9907921  | 17   | 74256913      | T     | C    | 0.6357       | 0.0477  | 0.0101         | 2.32E-06 | Nikpay <i>et al.</i> 2015 (26343387) |                       |
| rs663129   | 18   | 57838401      | A     | G    | 0.7432       | -0.0582 | 0.0105         | 3.21E-08 | Nikpay <i>et al.</i> 2015 (26343387) |                       |
| rs12979495 | 19   | 10964632      | A     | G    | 0.7493       | 0.0545  | 0.011          | 6.97E-07 | Nikpay <i>et al.</i> 2015 (26343387) |                       |
| rs56289821 | 19   | 11188247      | A     | G    | 0.8996       | 0.1103  | 0.0174         | 2.45E-10 | Nikpay <i>et al.</i> 2015 (26343387) |                       |
| rs6511721  | 19   | 11206575      | G     | A    | 0.5225       | -0.0564 | 0.0112         | 4.59E-07 | Nikpay <i>et al.</i> 2015 (26343387) |                       |
| rs8104311  | 19   | 15982760      | C     | T    | 0.6556       | -0.0465 | 0.0096         | 1.26E-06 | Nikpay <i>et al.</i> 2015 (26343387) |                       |
| rs6512216  | 19   | 17807147      | G     | T    | 0.4233       | 0.0574  | 0.0127         | 5.85E-06 | Nikpay <i>et al.</i> 2015 (26343387) |                       |
| rs9630903  | 19   | 17854655      | A     | G    | 0.5651       | -0.0785 | 0.0129         | 1.04E-09 | Nikpay <i>et al.</i> 2015            |                       |

| SNP rsID    | Chr. | hg19 position | NEFAL | EFAL | EF Frequency | Beta    | Standard Error | P value  | Study, year (PMID)                   | Comment               |
|-------------|------|---------------|-------|------|--------------|---------|----------------|----------|--------------------------------------|-----------------------|
|             |      |               |       |      |              |         |                |          | (26343387)                           |                       |
| rs75041078  | 19   | 41877491      | A     | G    | 0.7487       | -0.0778 | 0.0122         | 1.58E-10 | Nikpay <i>et al.</i> 2015 (26343387) |                       |
| rs118147862 | 19   | 45319631      | A     | G    | 0.9661       | 0.1702  | 0.0319         | 9.84E-08 | Nikpay <i>et al.</i> 2015 (26343387) |                       |
| rs405509    | 19   | 45408836      | T     | G    | 0.4971       | -0.0614 | 0.0101         | 1.45E-09 | Nikpay <i>et al.</i> 2015 (26343387) |                       |
| rs4420638   | 19   | 45422946      | G     | A    | 0.834        | -0.0848 | 0.0142         | 2.08E-09 | Nikpay <i>et al.</i> 2015 (26343387) |                       |
| rs1964272   | 19   | 46190268      | A     | G    | 0.5169       | 0.0462  | 0.0099         | 2.92E-06 | Nikpay <i>et al.</i> 2015 (26343387) |                       |
| rs13734     | 20   | 17594729      | A     | G    | 0.7798       | -0.0621 | 0.0116         | 8.99E-08 | Nikpay <i>et al.</i> 2015 (26343387) |                       |
| rs6129767   | 20   | 39822332      | G     | T    | 0.7044       | -0.0472 | 0.0102         | 3.99E-06 | Nikpay <i>et al.</i> 2015 (26343387) |                       |
| rs763475    | 20   | 40964651      | C     | T    | 0.8592       | -0.0664 | 0.0144         | 4.19E-06 | Nikpay <i>et al.</i> 2015 (26343387) |                       |
| rs6095611   | 20   | 48315902      | A     | G    | 0.4954       | -0.0435 | 0.0097         | 6.49E-06 | Nikpay <i>et al.</i> 2015 (26343387) | Missing in UK Biobank |
| rs11911017  | 21   | 30567941      | T     | G    | 0.8258       | -0.1017 | 0.0141         | 6.08E-13 | Nikpay <i>et al.</i> 2015 (26343387) |                       |
| rs28451064  | 21   | 35593827      | A     | G    | 0.8788       | -0.1162 | 0.0167         | 3.08E-12 | Nikpay <i>et al.</i> 2015 (26343387) |                       |
| rs7280276   | 21   | 35659776      | A     | G    | 0.7619       | -0.0569 | 0.0116         | 9.98E-07 | Nikpay <i>et al.</i> 2015 (26343387) |                       |
| rs180803    | 22   | 24658858      | G     | T    | 0.0293       | -0.1809 | 0.0283         | 1.65E-10 | Nikpay <i>et al.</i> 2015 (26343387) | Missing in UK Biobank |
| rs9608859   | 22   | 30667277      | T     | C    | 0.5879       | 0.0481  | 0.0096         | 5.37E-07 | Nikpay <i>et al.</i> 2015 (26343387) |                       |

Single Nucleotide Polymorphisms (SNPs) were selected from the GCTA results of Nikpay *et al* which included non-European populations.

**eTable 2.** Single-nucleotide polymorphisms used to build the genetic risk score for atrial fibrillation

| SNP rsID   | Chr. | hg19 position | NEFAL | EFAL | EF Frequency | Beta            | Standard Error | P value   | Study, year (PMID)                              | Comment |
|------------|------|---------------|-------|------|--------------|-----------------|----------------|-----------|-------------------------------------------------|---------|
| rs11264280 | 1    | 154862952     | C     | T    | 0.31         | 0.11332<br>8685 | 0.013560234    | 6.41E-17  | Christophersen <i>et al.</i><br>2017 (28416818) |         |
| rs72700118 | 1    | 170194823     | C     | A    | 0.12         | 0.13102<br>8262 | 0.019651454    | 2.60E-11  | Christophersen <i>et al.</i><br>2017 (28416818) |         |
| rs520525   | 1    | 170638333     | G     | A    | 0.71         | 0.11332<br>8685 | 0.014022976    | 6.39E-16  | Christophersen <i>et al.</i><br>2017 (28416818) |         |
| rs2540949  | 2    | 65284231      | T     | A    | 0.61         | 0.07696<br>1041 | 0.012211313    | 2.93E-10  | Christophersen <i>et al.</i><br>2017 (28416818) |         |
| rs3771537  | 2    | 70038792      | C     | A    | 0.53         | 0.08617<br>7696 | 0.012599101    | 7.92E-12  | Christophersen <i>et al.</i><br>2017 (28416818) |         |
| rs2288327  | 2    | 179411665     | A     | G    | 0.2          | 0.08617<br>7696 | 0.015367667    | 2.05E-08  | Christophersen <i>et al.</i><br>2017 (28416818) |         |
| rs11718898 | 3    | 12848822      | T     | C    | 0.65         | 0.07696<br>1041 | 0.014087537    | 4.68E-08  | Christophersen <i>et al.</i><br>2017 (28416818) |         |
| rs6800541  | 3    | 38774832      | C     | T    | 0.61         | 0.07696<br>1041 | 0.01565217     | 8.79E-07  | Christophersen <i>et al.</i><br>2017 (28416818) |         |
| rs17042171 | 4    | 111708287     | C     | A    | 0.21         | 0.49469<br>6242 | 0.015386224    | 8.31E-227 | Christophersen <i>et al.</i><br>2017 (28416818) |         |
| rs337711   | 5    | 113748571     | C     | T    | 0.39         | 0.06765<br>8648 | 0.012200488    | 2.93E-08  | Christophersen <i>et al.</i><br>2017 (28416818) |         |
| rs2967791  | 5    | 137013106     | C     | T    | 0.54         | 0.06765<br>8648 | 0.012173364    | 2.73E-08  | Christophersen <i>et al.</i><br>2017 (28416818) |         |
| rs4946333  | 6    | 118565665     | A     | G    | 0.5          | 0.07696<br>1041 | 0.012811916    | 1.89E-09  | Christophersen <i>et al.</i><br>2017 (28416818) |         |
| rs12664873 | 6    | 122463191     | G     | T    | 0.7          | 0.07696<br>1041 | 0.013499207    | 1.19E-08  | Christophersen <i>et al.</i><br>2017 (28416818) |         |
| rs1997572  | 7    | 116198828     | A     | G    | 0.59         | 0.09531<br>018  | 0.012233128    | 6.64E-15  | Christophersen <i>et al.</i><br>2017 (28416818) |         |
| rs7508     | 8    | 17913970      | G     | A    | 0.72         | 0.08617<br>7696 | 0.013867956    | 5.16E-10  | Christophersen <i>et al.</i><br>2017 (28416818) |         |
| rs7026071  | 9    | 97492520      | C     | T    | 0.4          | 0.08617<br>7696 | 0.012149257    | 1.31E-12  | Christophersen <i>et al.</i><br>2017 (28416818) |         |
| rs60632610 | 10   | 75415677      | T     | C    | 0.85         | 0.11332<br>8685 | 0.017703848    | 1.54E-10  | Christophersen <i>et al.</i><br>2017 (28416818) |         |
| rs11598047 | 10   | 105342672     | A     | G    | 0.16         | 0.16551         | 0.016958283    | 1.67E-22  | Christophersen <i>et al.</i>                    |         |

| SNP rsID   | Chr. | hg19 position | NEFAL | EFAL | EF Frequency | Beta            | Standard Error | P value   | Study, year (PMID)                              | Comment                         |
|------------|------|---------------|-------|------|--------------|-----------------|----------------|-----------|-------------------------------------------------|---------------------------------|
|            |      |               |       |      |              | 4438            |                |           | 2017 (28416818)                                 |                                 |
| rs35176054 | 10   | 105480387     | T     | A    | 0.13         | 0.13102<br>8262 | 0.01919075     | 8.63E-12  | Christophersen <i>et al.</i><br>2017 (28416818) |                                 |
| rs75190942 | 11   | 128764571     | C     | A    | 0.8          | 0.15700<br>3749 | 0.027780613    | 1.59E-08  | Christophersen <i>et al.</i><br>2017 (28416818) |                                 |
| rs11047543 | 12   | 24788339      | A     | G    | 0.86         | 0.13102<br>8262 | 0.018704984    | 2.47E-12  | Christophersen <i>et al.</i><br>2017 (28416818) |                                 |
| rs883079   | 12   | 114793240     | C     | T    | 0.7          | 0.10436<br>0015 | 0.013119783    | 1.80E-15  | Christophersen <i>et al.</i><br>2017 (28416818) |                                 |
| rs1152591  | 14   | 64680848      | G     | A    | 0.46         | 0.08617<br>7696 | 0.013338096    | 1.04E-10  | Christophersen <i>et al.</i><br>2017 (28416818) |                                 |
| rs74022964 | 15   | 73677264      | C     | T    | 0.17         | 0.11332<br>8685 | 0.016962335    | 2.37E-11  | Christophersen <i>et al.</i><br>2017 (28416818) |                                 |
| rs2106261  | 16   | 73051620      | C     | T    | 0.19         | 0.18232<br>1557 | 0.015533156    | 8.18E-32  | Christophersen <i>et al.</i><br>2017 (28416818) |                                 |
| rs13376333 | 1    | 154814353     | C     | T    | 0.23         | 0.12221<br>7633 | 0.017266677    | 1.46E-12  | Christophersen <i>et al.</i><br>2017 (28416818) | Removed<br>after LD<br>clumping |
| rs6843082  | 4    | 111718067     | A     | G    | 0.25         | 0.37156<br>3556 | 0.014000485    | 3.41E-155 | Christophersen <i>et al.</i><br>2017 (28416818) | Removed<br>after LD<br>clumping |
| rs89107    | 6    | 118578043     | A     | G    | 0.58         | 0.06765<br>8648 | 0.013803617    | 9.51E-07  | Christophersen <i>et al.</i><br>2017 (28416818) | Removed<br>after LD<br>clumping |
| rs3807989  | 7    | 116186241     | A     | G    | 0.58         | 0.08617<br>7696 | 0.015947256    | 6.52E-08  | Christophersen <i>et al.</i><br>2017 (28416818) | Removed<br>after LD<br>clumping |
| rs7915134  | 10   | 75420180      | T     | C    | 0.85         | 0.11332<br>8685 | 0.017740696    | 1.68E-10  | Christophersen <i>et al.</i><br>2017 (28416818) | Removed<br>after LD<br>clumping |
| rs10151658 | 14   | 64612858      | A     | C    | 0.49         | 0.06765<br>8648 | 0.013477105    | 5.16E-07  | Christophersen <i>et al.</i><br>2017 (28416818) | Removed<br>after LD<br>clumping |
| rs2106261  | 16   | 73051620      | G     | A    | 0.17         | 0.19062<br>036  | 0.021329426    | 4.00E-19  | Christophersen <i>et al.</i><br>2017 (28416818) | Removed<br>after LD<br>clumping |

Single Nucleotide Polymorphisms (SNPs) were selected from analyses that included both European and non-European populations.

**eTable 3.** Single-nucleotide polymorphisms used to build the genetic risk score for stroke

| SNP rsID          | Chr.     | hg19 position   | NEFAL    | EFAL     | EF Frequency | Beta                    | Standard Error     | P value         | Study, year (PMID)                             | Comment                          |
|-------------------|----------|-----------------|----------|----------|--------------|-------------------------|--------------------|-----------------|------------------------------------------------|----------------------------------|
| rs880315          | 1        | 10796866        | T        | C        | 0.4          | 0.04879<br>0164         | 0.007782034        | 3.62E-10        | Malik <i>et al.</i> 2018<br>(29531354)         |                                  |
| rs12037987        | 1        | 113042822       | T        | C        | 0.16         | 0.06765<br>8649         | 0.012173364        | 2.73E-08        | Malik <i>et al.</i> 2018<br>(29531354)         |                                  |
| rs1052053         | 1        | 156202173       | A        | G        | 0.4          | 0.05826<br>8908         | 0.00765493         | 2.70E-14        | Malik <i>et al.</i> 2018<br>(29531354)         |                                  |
| rs4959130         | 6        | 1356916         | G        | A        | 0.14         | 0.07696<br>1041         | 0.012714117        | 1.42E-09        | Malik <i>et al.</i> 2018<br>(29531354)         |                                  |
| rs16896398        | 6        | 43262704        | A        | T        | 0.34         | 0.04879<br>0164         | 0.008580656        | 1.30E-08        | Malik <i>et al.</i> 2018<br>(29531354)         |                                  |
| rs7859727         | 9        | 22102165        | C        | T        | 0.53         | 0.04879<br>0164         | 0.007811844        | 4.22E-10        | Malik <i>et al.</i> 2018<br>(29531354)         |                                  |
| rs2295786         | 10       | 105616482       | T        | A        | 0.6          | 0.04879<br>0164         | 0.007650357        | 1.80E-10        | Malik <i>et al.</i> 2018<br>(29531354)         |                                  |
| rs35436           | 12       | 115554523       | T        | C        | 0.62         | 0.04879<br>0164         | 0.008792307        | 2.87E-08        | Malik <i>et al.</i> 2018<br>(29531354)         |                                  |
| rs9526212         | 13       | 47225745        | A        | G        | 0.76         | 0.05826<br>8908         | 0.009370755        | 5.03E-10        | Malik <i>et al.</i> 2018<br>(29531354)         |                                  |
| rs12445022        | 16       | 87575332        | G        | A        | 0.31         | 0.05826<br>8908         | 0.009020553        | 1.05E-10        | Malik <i>et al.</i> 2018<br>(29531354)         |                                  |
| rs8103309         | 19       | 11174935        | C        | T        | 0.65         | 0.04879<br>0164         | 0.008839627        | 3.40E-08        | Malik <i>et al.</i> 2018<br>(29531354)         |                                  |
| <b>rs12476527</b> | <b>2</b> | <b>26915624</b> | <b>T</b> | <b>G</b> | <b>0.48</b>  | <b>0.04879<br/>0164</b> | <b>0.009024966</b> | <b>6.44E-08</b> | <b>Malik <i>et al.</i> 2018<br/>(29531354)</b> | <b>Missing in<br/>UK Biobank</b> |

Single Nucleotide Polymorphisms (SNPs) were selected from analyses that included both European and non-European populations.



**eTable 4.** Single-nucleotide polymorphisms used to build the genetic risk score for hypertension (based on systolic blood pressure)

| SNP rsID          | Chr.     | hg19 position   | NEFAL    | EFAL     | EF Frequency | Beta          | Standard Error | P value         | Study, year (PMID)                         | Comment                          |
|-------------------|----------|-----------------|----------|----------|--------------|---------------|----------------|-----------------|--------------------------------------------|----------------------------------|
| rs880315          | 1        | 10796866        | C        | T        | 0.641        | -0.475        | 0.062          | 2.09E-14        | Ehret <i>et al.</i> 2016 (27618452)        |                                  |
| rs17037390        | 1        | 11860843        | G        | A        | 0.155        | -0.908        | 0.081          | 5.95E-29        | Ehret <i>et al.</i> 2016 (27618452)        |                                  |
| <b>rs7515635</b>  | <b>1</b> | <b>42408070</b> | <b>C</b> | <b>T</b> | <b>0.468</b> | <b>0.336</b>  | <b>0.057</b>   | <b>4.54E-09</b> | <b>Ehret <i>et al.</i> 2016 (27618452)</b> | <b>Removed after LD clumping</b> |
| rs1620668         | 1        | 113023980       | G        | A        | 0.822        | -0.535        | 0.076          | 1.45E-12        | Ehret <i>et al.</i> 2016 (27618452)        |                                  |
| rs2493134         | 1        | 230849359       | C        | T        | 0.579        | -0.413        | 0.058          | 9.65E-13        | Ehret <i>et al.</i> 2016 (27618452)        |                                  |
| rs2586886         | 2        | 26932031        | C        | T        | 0.599        | -0.404        | 0.059          | 5.94E-12        | Ehret <i>et al.</i> 2016 (27618452)        |                                  |
| rs1371182         | 2        | 165099215       | C        | T        | 0.443        | -0.444        | 0.058          | 1.89E-14        | Ehret <i>et al.</i> 2016 (27618452)        |                                  |
| rs2594992         | 3        | 11360997        | C        | A        | 0.607        | -0.334        | 0.06           | 2.31E-08        | Ehret <i>et al.</i> 2016 (27618452)        |                                  |
| rs11128722        | 3        | 14958126        | G        | A        | 0.563        | -0.383        | 0.061          | 4.44E-10        | Ehret <i>et al.</i> 2016 (27618452)        |                                  |
| rs711737          | 3        | 27543655        | C        | A        | 0.604        | 0.334         | 0.058          | 9.93E-09        | Ehret <i>et al.</i> 2016 (27618452)        |                                  |
| rs6442101         | 3        | 48130893        | C        | T        | 0.692        | 0.396         | 0.062          | 1.62E-10        | Ehret <i>et al.</i> 2016 (27618452)        |                                  |
| rs6779380         | 3        | 169111915       | C        | T        | 0.539        | -0.439        | 0.06           | 1.85E-13        | Ehret <i>et al.</i> 2016 (27618452)        |                                  |
| rs2291435         | 4        | 38387395        | C        | T        | 0.524        | -0.378        | 0.059          | 1.03E-10        | Ehret <i>et al.</i> 2016 (27618452)        |                                  |
| rs1458038         | 4        | 81164723        | C        | T        | 0.3          | 0.659         | 0.065          | 5.36E-24        | Ehret <i>et al.</i> 2016 (27618452)        |                                  |
| <b>rs17010957</b> | <b>4</b> | <b>86719165</b> | <b>C</b> | <b>T</b> | <b>0.857</b> | <b>-0.498</b> | <b>0.082</b>   | <b>1.51E-09</b> | <b>Ehret <i>et al.</i> 2016 (27618452)</b> | <b>Removed after LD clumping</b> |
| rs13107325        | 4        | 103188709       | C        | T        | 0.07         | -0.837        | 0.127          | 4.69E-11        | Ehret <i>et al.</i> 2016 (27618452)        |                                  |
| rs4691707         | 4        | 156441314       | G        | A        | 0.652        | -0.349        | 0.06           | 7.10E-09        | Ehret <i>et al.</i> 2016                   |                                  |

| SNP rsID   | Chr. | hg19 position | NEFAL | EFAL | EF Frequency | Beta   | Standard Error | P value  | Study, year (PMID)                     | Comment                   |
|------------|------|---------------|-------|------|--------------|--------|----------------|----------|----------------------------------------|---------------------------|
|            |      |               |       |      |              |        |                |          | (27618452)                             |                           |
| rs12656497 | 5    | 32831939      | C     | T    | 0.403        | -0.487 | 0.06           | 3.85E-16 | Ehret <i>et al.</i> 2016<br>(27618452) |                           |
| rs10077885 | 5    | 114390121     | C     | A    | 0.501        | -0.261 | 0.058          | 5.50E-06 | Ehret <i>et al.</i> 2016<br>(27618452) | Removed after LD clumping |
| rs11953630 | 5    | 157845402     | C     | T    | 0.366        | -0.38  | 0.065          | 3.91E-09 | Ehret <i>et al.</i> 2016<br>(27618452) | Removed after LD clumping |
| rs1799945  | 6    | 26091179      | G     | C    | 0.857        | -0.598 | 0.086          | 3.28E-12 | Ehret <i>et al.</i> 2016<br>(27618452) |                           |
| rs6919440  | 6    | 43352898      | G     | A    | 0.57         | -0.337 | 0.058          | 4.92E-09 | Ehret <i>et al.</i> 2016<br>(27618452) | Removed after LD clumping |
| rs1361831  | 6    | 127181089     | C     | T    | 0.541        | -0.482 | 0.058          | 7.38E-17 | Ehret <i>et al.</i> 2016<br>(27618452) |                           |
| rs2969070  | 7    | 2512545       | G     | A    | 0.639        | -0.315 | 0.061          | 1.93E-07 | Ehret <i>et al.</i> 2016<br>(27618452) |                           |
| rs3735533  | 7    | 27245893      | C     | T    | 0.081        | -0.798 | 0.106          | 6.48E-14 | Ehret <i>et al.</i> 2016<br>(27618452) |                           |
| rs12705390 | 7    | 106410777     | G     | A    | 0.227        | 0.619  | 0.069          | 2.69E-19 | Ehret <i>et al.</i> 2016<br>(27618452) |                           |
| rs11556924 | 7    | 129663496     | C     | T    | 0.384        | -0.336 | 0.062          | 6.05E-08 | Ehret <i>et al.</i> 2016<br>(27618452) |                           |
| rs2898290  | 8    | 11433909      | C     | T    | 0.491        | 0.377  | 0.058          | 8.85E-11 | Ehret <i>et al.</i> 2016<br>(27618452) |                           |
| rs10760117 | 9    | 123586737     | G     | T    | 0.415        | 0.334  | 0.06           | 2.54E-08 | Ehret <i>et al.</i> 2016<br>(27618452) |                           |
| rs6271     | 9    | 136522274     | C     | T    | 0.072        | -0.567 | 0.122          | 3.60E-06 | Ehret <i>et al.</i> 2016<br>(27618452) |                           |
| rs12243859 | 10   | 18740632      | C     | T    | 0.326        | -0.402 | 0.061          | 6.13E-11 | Ehret <i>et al.</i> 2016<br>(27618452) |                           |
| rs7076398  | 10   | 63533663      | T     | A    | 0.188        | -0.563 | 0.076          | 1.72E-13 | Ehret <i>et al.</i> 2016<br>(27618452) |                           |
| rs12247028 | 10   | 75410052      | G     | A    | 0.611        | -0.364 | 0.063          | 8.16E-09 | Ehret <i>et al.</i> 2016<br>(27618452) |                           |
| rs932764   | 10   | 95895940      | G     | A    | 0.554        | -0.495 | 0.059          | 6.88E-17 | Ehret <i>et al.</i> 2016               |                           |

| SNP rsID   | Chr. | hg19 position | NEFAL | EFAL | EF Frequency | Beta   | Standard Error | P value  | Study, year (PMID)                     | Comment                   |
|------------|------|---------------|-------|------|--------------|--------|----------------|----------|----------------------------------------|---------------------------|
|            |      |               |       |      |              |        |                |          | (27618452)                             |                           |
| rs943037   | 10   | 104835919     | C     | T    | 0.087        | -1.133 | 0.105          | 2.35E-27 | Ehret <i>et al.</i> 2016<br>(27618452) |                           |
| rs740746   | 10   | 115792787     | G     | A    | 0.73         | 0.486  | 0.067          | 4.59E-13 | Ehret <i>et al.</i> 2016<br>(27618452) |                           |
| rs592373   | 11   | 1890990       | G     | A    | 0.64         | 0.484  | 0.063          | 2.02E-14 | Ehret <i>et al.</i> 2016<br>(27618452) |                           |
| rs1450271  | 11   | 10356115      | C     | T    | 0.468        | 0.413  | 0.059          | 3.40E-12 | Ehret <i>et al.</i> 2016<br>(27618452) |                           |
| rs1156725  | 11   | 16307700      | C     | T    | 0.804        | -0.447 | 0.072          | 5.65E-10 | Ehret <i>et al.</i> 2016<br>(27618452) |                           |
| rs7103648  | 11   | 47461783      | G     | A    | 0.614        | -0.267 | 0.061          | 1.09E-05 | Ehret <i>et al.</i> 2016<br>(27618452) | Removed after LD clumping |
| rs751984   | 11   | 61278246      | C     | T    | 0.879        | 0.341  | 0.088          | 1.11E-04 | Ehret <i>et al.</i> 2016<br>(27618452) |                           |
| rs3741378  | 11   | 65408937      | C     | T    | 0.137        | -0.486 | 0.084          | 8.04E-09 | Ehret <i>et al.</i> 2016<br>(27618452) |                           |
| rs633185   | 11   | 100593538     | G     | C    | 0.715        | 0.522  | 0.067          | 6.97E-15 | Ehret <i>et al.</i> 2016<br>(27618452) |                           |
| rs11105354 | 12   | 90026523      | G     | A    | 0.84         | 0.909  | 0.081          | 3.88E-29 | Ehret <i>et al.</i> 2016<br>(27618452) |                           |
| rs3184504  | 12   | 111884608     | C     | T    | 0.475        | 0.498  | 0.062          | 9.97E-16 | Ehret <i>et al.</i> 2016<br>(27618452) |                           |
| rs936226   | 15   | 75069282      | C     | T    | 0.722        | -0.549 | 0.067          | 3.06E-16 | Ehret <i>et al.</i> 2016<br>(27618452) |                           |
| rs2521501  | 15   | 91437388      | T     | A    | 0.684        | -0.639 | 0.069          | 3.35E-20 | Ehret <i>et al.</i> 2016<br>(27618452) |                           |
| rs7213273  | 17   | 43155914      | G     | A    | 0.658        | -0.413 | 0.066          | 4.71E-10 | Ehret <i>et al.</i> 2016<br>(27618452) |                           |
| rs17608766 | 17   | 45013271      | C     | T    | 0.854        | -0.658 | 0.083          | 2.27E-15 | Ehret <i>et al.</i> 2016<br>(27618452) |                           |
| rs12958173 | 18   | 42141977      | C     | A    | 0.306        | 0.386  | 0.063          | 1.19E-09 | Ehret <i>et al.</i> 2016<br>(27618452) | Removed after LD clumping |
| rs4247374  | 19   | 7252756       | C     | T    | 0.143        | -0.446 | 0.091          | 1.05E-06 | Ehret <i>et al.</i> 2016<br>(27618452) | Removed after LD          |

| SNP rsID   | Chr. | hg19 position | NEFAL | EFAL | EF Frequency | Beta   | Standard Error | P value  | Study, year (PMID)                    | Comment                   |
|------------|------|---------------|-------|------|--------------|--------|----------------|----------|---------------------------------------|---------------------------|
|            |      |               |       |      |              |        |                |          |                                       | clumping                  |
| rs1327235  | 20   | 10969030      | G     | A    | 0.542        | -0.395 | 0.059          | 2.23E-11 | Ehret <i>et al.</i> 2016 (27618452)   |                           |
| rs6026748  | 20   | 57745815      | G     | A    | 0.125        | 0.867  | 0.089          | 3.15E-22 | Ehret <i>et al.</i> 2016 (27618452)   |                           |
| rs12627651 | 21   | 44760603      | G     | A    | 0.288        | 0.503  | 0.068          | 1.97E-13 | Ehret <i>et al.</i> 2016 (27618452)   |                           |
| rs783621   | 1    | 42368035      | G     | A    | NA           | 0.329  | NA             | 4.20E-12 | Hoffman <i>et al.</i> 2017 (27841878) |                           |
| rs2404715  | 1    | 57008778      | T     | C    | NA           | 0.313  | NA             | 1.60E-04 | Hoffman <i>et al.</i> 2017 (27841878) |                           |
| rs60199046 | 1    | 59663341      | G     | A    | NA           | 0.165  | NA             | 2.50E-03 | Hoffman <i>et al.</i> 2017 (27841878) |                           |
| rs2761436  | 1    | 207919748     | T     | C    | NA           | -0.279 | NA             | 8.40E-09 | Hoffman <i>et al.</i> 2017 (27841878) |                           |
| rs13403122 | 2    | 43078758      | T     | C    | NA           | 0.29   | NA             | 1.20E-07 | Hoffman <i>et al.</i> 2017 (27841878) |                           |
| rs6434404  | 2    | 191494411     | G     | A    | NA           | 0.346  | NA             | 2.90E-10 | Hoffman <i>et al.</i> 2017 (27841878) |                           |
| rs1250247  | 2    | 216299629     | G     | C    | NA           | 0.252  | NA             | 4.30E-06 | Hoffman <i>et al.</i> 2017 (27841878) |                           |
| rs12630213 | 3    | 14954411      | T     | C    | NA           | 0.307  | NA             | 8.70E-10 | Hoffman <i>et al.</i> 2017 (27841878) | Removed after LD clumping |
| rs75305034 | 3    | 133886705     | C     | T    | NA           | 0.331  | NA             | 3.40E-10 | Hoffman <i>et al.</i> 2017 (27841878) |                           |
| rs2178452  | 3    | 160370160     | A     | G    | NA           | 0.304  | NA             | 1.30E-09 | Hoffman <i>et al.</i> 2017 (27841878) |                           |
| rs13104866 | 4    | 38402183      | A     | G    | NA           | 0.292  | NA             | 1.20E-09 | Hoffman <i>et al.</i> 2017 (27841878) | Removed after LD clumping |
| rs4292285  | 4    | 145271954     | A     | T    | NA           | 0.25   | NA             | 2.30E-07 | Hoffman <i>et al.</i> 2017 (27841878) |                           |
| rs4475250  | 5    | 114375552     | A     | G    | NA           | 0.297  | NA             | 5.30E-10 | Hoffman <i>et al.</i> 2017 (27841878) |                           |
| rs35410524 | 6    | 96885405      | T     | C    | NA           | -0.359 | NA             | 4.00E-09 | Hoffman <i>et al.</i> 2017 (27841878) |                           |

| SNP rsID   | Chr. | hg19 position | NEFAL | EFAL | EF Frequency | Beta   | Standard Error | P value  | Study, year (PMID)                    | Comment                   |
|------------|------|---------------|-------|------|--------------|--------|----------------|----------|---------------------------------------|---------------------------|
| rs10818775 | 9    | 125755571     | T     | C    | NA           | 0.333  | NA             | 1.50E-06 | Hoffman <i>et al.</i> 2017 (27841878) |                           |
| rs34872471 | 10   | 114754071     | C     | T    | NA           | -0.257 | NA             | 1.40E-06 | Hoffman <i>et al.</i> 2017 (27841878) |                           |
| rs360158   | 11   | 9753601       | A     | G    | NA           | -0.291 | NA             | 2.90E-09 | Hoffman <i>et al.</i> 2017 (27841878) | Removed after LD clumping |
| rs7107356  | 11   | 47676170      | G     | A    | NA           | -0.281 | NA             | 3.50E-09 | Hoffman <i>et al.</i> 2017 (27841878) |                           |
| rs61448762 | 11   | 48923756      | A     | G    | NA           | 0.439  | NA             | 2.10E-08 | Hoffman <i>et al.</i> 2017 (27841878) | Removed after LD clumping |
| rs7927515  | 11   | 76125330      | A     | C    | NA           | -0.249 | NA             | 6.50E-07 | Hoffman <i>et al.</i> 2017 (27841878) |                           |
| rs2289125  | 11   | 89224453      | C     | A    | NA           | -0.207 | NA             | 2.30E-04 | Hoffman <i>et al.</i> 2017 (27841878) |                           |
| rs7977389  | 12   | 49981722      | C     | T    | NA           | 0.322  | NA             | 2.00E-05 | Hoffman <i>et al.</i> 2017 (27841878) |                           |
| rs10747570 | 12   | 50509937      | G     | A    | NA           | 0.302  | NA             | 1.40E-09 | Hoffman <i>et al.</i> 2017 (27841878) |                           |
| rs63418562 | 13   | 30146201      | T     | C    | NA           | 0.312  | NA             | 8.90E-09 | Hoffman <i>et al.</i> 2017 (27841878) |                           |
| rs3011549  | 13   | 113634937     | C     | A    | NA           | 0.347  | NA             | 3.90E-08 | Hoffman <i>et al.</i> 2017 (27841878) |                           |
| rs2759308  | 15   | 81016227      | A     | G    | NA           | -0.302 | NA             | 6.90E-10 | Hoffman <i>et al.</i> 2017 (27841878) |                           |
| rs12596053 | 16   | 4946794       | C     | A    | NA           | -0.318 | NA             | 7.40E-11 | Hoffman <i>et al.</i> 2017 (27841878) |                           |
| rs35261357 | 16   | 75444572      | T     | C    | NA           | -0.184 | NA             | 1.50E-04 | Hoffman <i>et al.</i> 2017 (27841878) |                           |
| rs460105   | 16   | 89682006      | C     | T    | NA           | 0.327  | NA             | 8.10E-09 | Hoffman <i>et al.</i> 2017 (27841878) |                           |
| rs12606620 | 18   | 42008097      | T     | G    | NA           | 0.319  | NA             | 5.20E-10 | Hoffman <i>et al.</i> 2017 (27841878) |                           |
| rs2193635  | 18   | 43096236      | T     | C    | NA           | -0.269 | NA             | 6.70E-06 | Hoffman <i>et al.</i> 2017 (27841878) |                           |
| rs10427021 | 19   | 7259346       | G     | T    | NA           | 0.375  | NA             | 1.60E-07 | Hoffman <i>et al.</i> 2017 (27841878) |                           |

| SNP rsID    | Chr. | hg19 position | NEFAL | EFAL | EF Frequency | Beta    | Standard Error | P value  | Study, year (PMID)                      | Comment                   |
|-------------|------|---------------|-------|------|--------------|---------|----------------|----------|-----------------------------------------|---------------------------|
| rs8105753   | 19   | 31927547      | C     | A    | NA           | 0.298   | NA             | 1.60E-09 | Hoffman <i>et al.</i> 2017 (27841878)   |                           |
| rs141216986 | 23   | 127728549     | T     | C    | NA           | 0.818   | NA             | 1.70E-08 | Hoffman <i>et al.</i> 2017 (27841878)   | Removed after LD clumping |
| rs2014912   | 4    | 86715670      | C     | T    | 0.165        | 0.620   | 0.074          | 5.37E-17 | Kato <i>et al.</i> 2015 (26390057)      |                           |
| rs13359291  | 5    | 122476457     | G     | A    | 0.273        | 0.534   | 0.066          | 8.88E-16 | Kato <i>et al.</i> 2015 (26390057)      |                           |
| rs1563788   | 6    | 43308363      | C     | T    | 0.309        | 0.511   | 0.062          | 2.22E-16 | Kato <i>et al.</i> 2015 (26390057)      |                           |
| rs2493292   | 1    | 3328659       | C     | T    | 0.151        | 0.37    | 0.07           | 1.40E-08 | Liu <i>et al.</i> 2016 (27618448)       |                           |
| rs2270860   | 6    | 43270151      | C     | T    | 0.367        | 0.32    | 0.05           | 2.90E-11 | Liu <i>et al.</i> 2016 (27618448)       | Removed after LD clumping |
| rs5219      | 11   | 17409572      | C     | T    | 0.32         | 0.32    | 0.05           | 4.90E-12 | Liu <i>et al.</i> 2016 (27618448)       |                           |
| rs11639856  | 16   | 24788645      | T     | A    | 0.193        | -0.34   | 0.06           | 1.30E-08 | Liu <i>et al.</i> 2016 (27618448)       |                           |
| rs4823006   | 22   | 29451671      | A     | G    | 0.424        | -0.26   | 0.05           | 7.90E-09 | Liu <i>et al.</i> 2016 (27618448)       |                           |
| rs35529250  | 4    | 40428091      | C     | T    | 0.0097       | -15.511 | NA             | 2.42E-08 | Surendran <i>et al.</i> 2016 (27618447) |                           |
| rs1008058   | 5    | 122435627     | G     | A    | 0.1325       | 0.5535  | NA             | 2.99E-10 | Surendran <i>et al.</i> 2016 (27618447) | Removed after LD clumping |
| rs9349379   | 6    | 12903957      | G     | A    | 0.5686       | 0.289   | NA             | 8.84E-10 | Surendran <i>et al.</i> 2016 (27618447) |                           |
| rs4728142   | 7    | 128573967     | G     | A    | 0.4341       | -0.2416 | NA             | 3.45E-08 | Surendran <i>et al.</i> 2016 (27618447) |                           |
| rs34591516  | 8    | 142367087     | C     | T    | 0.0539       | 0.6358  | NA             | 6.10E-10 | Surendran <i>et al.</i> 2016 (27618447) |                           |
| rs4387287   | 10   | 105677897     | C     | A    | 0.1556       | 0.361   | NA             | 9.12E-10 | Surendran <i>et al.</i> 2016 (27618447) |                           |
| rs11229457  | 11   | 58207203      | C     | T    | 0.2332       | -0.312  | NA             | 2.70E-08 | Surendran <i>et al.</i> 2016 (27618447) |                           |

| SNP rsID    | Chr. | hg19 position | NEFAL                                   | EFAL | EF Frequency | Beta    | Standard Error | P value  | Study, year (PMID)                      | Comment                   |
|-------------|------|---------------|-----------------------------------------|------|--------------|---------|----------------|----------|-----------------------------------------|---------------------------|
| rs7406910   | 17   | 46688256      | C                                       | T    | 0.1136       | -0.4563 | NA             | 3.80E-08 | Surendran <i>et al.</i> 2016 (27618447) |                           |
| rs139385870 | 1    | 1685921       | TCCCT<br>GGGAC<br>CGAAG<br>TCGCC<br>CCA | T    | NA           | -0.31   | 0.07           | 1.00E-05 | Warren <i>et al.</i> 2017 (28135244)    | Missing in UK Biobank     |
| rs3820068   | 1    | 15798197      | G                                       | A    | NA           | 0.367   | 0.08           | 5.30E-06 | Warren <i>et al.</i> 2017 (28135244)    |                           |
| rs10922502  | 1    | 89360158      | G                                       | A    | NA           | -0.307  | 0.06           | 2.00E-06 | Warren <i>et al.</i> 2017 (28135244)    |                           |
| rs7562      | 2    | 28635740      | C                                       | T    | NA           | 0.182   | 0.06           | 3.70E-03 | Warren <i>et al.</i> 2017 (28135244)    |                           |
| rs13420463  | 2    | 37517566      | G                                       | A    | NA           | 0.244   | 0.07           | 7.30E-04 | Warren <i>et al.</i> 2017 (28135244)    |                           |
| rs55780018  | 2    | 208526140     | C                                       | T    | NA           | -0.36   | 0.07           | 5.10E-08 | Warren <i>et al.</i> 2017 (28135244)    |                           |
| rs9859176   | 3    | 134000025     | C                                       | T    | NA           | 0.248   | 0.06           | 9.60E-05 | Warren <i>et al.</i> 2017 (28135244)    | Removed after LD clumping |
| rs13112725  | 4    | 106911742     | G                                       | C    | NA           | 0.45    | 0.08           | 9.40E-09 | Warren <i>et al.</i> 2017 (28135244)    |                           |
| rs10059921  | 5    | 87514515      | G                                       | T    | NA           | -0.417  | 0.12           | 7.90E-04 | Warren <i>et al.</i> 2017 (28135244)    |                           |
| rs6595838   | 5    | 127868199     | G                                       | A    | NA           | 0.236   | 0.07           | 4.50E-04 | Warren <i>et al.</i> 2017 (28135244)    |                           |
| rs6911827   | 6    | 22130601      | C                                       | T    | NA           | 0.19    | 0.06           | 2.10E-03 | Warren <i>et al.</i> 2017 (28135244)    |                           |
| rs78648104  | 6    | 50683009      | C                                       | T    | NA           | -0.329  | 0.11           | 4.00E-03 | Warren <i>et al.</i> 2017 (28135244)    |                           |
| rs13238550  | 7    | 131059056     | G                                       | A    | NA           | 0.212   | 0.06           | 7.10E-04 | Warren <i>et al.</i> 2017 (28135244)    |                           |
| rs1011018   | 7    | 139463264     | G                                       | A    | NA           | -0.244  | 0.08           | 1.60E-03 | Warren <i>et al.</i> 2017 (28135244)    | Missing in UK Biobank     |
| rs894344    | 8    | 135612745     | G                                       | A    | NA           | -0.163  | 0.06           | 8.20E-03 | Warren <i>et al.</i> 2017 (28135244)    |                           |
| rs112184198 | 10   | 102604514     | G                                       | A    | NA           | -0.532  | 0.1            | 1.30E-07 | Warren <i>et al.</i> 2017 (28135244)    |                           |

| SNP rsID   | Chr. | hg19 position | NEFAL | EFAL | EF Frequency | Beta   | Standard Error | P value  | Study, year (PMID)                   | Comment                   |
|------------|------|---------------|-------|------|--------------|--------|----------------|----------|--------------------------------------|---------------------------|
| rs6487543  | 12   | 26438189      | G     | A    | NA           | 0.279  | 0.06           | 2.10E-06 | Warren <i>et al.</i> 2017 (28135244) |                           |
| rs9549328  | 13   | 113636156     | C     | T    | NA           | 0.218  | 0.08           | 3.90E-03 | Warren <i>et al.</i> 2017 (28135244) | Removed after LD clumping |
| rs9888615  | 14   | 53377540      | C     | T    | NA           | -0.236 | 0.07           | 4.30E-04 | Warren <i>et al.</i> 2017 (28135244) |                           |
| rs8016306  | 14   | 63928546      | G     | A    | NA           | 0.25   | 0.07           | 7.90E-04 | Warren <i>et al.</i> 2017 (28135244) |                           |
| rs35199222 | 15   | 81013037      | G     | A    | NA           | 0.298  | 0.06           | 1.70E-06 | Warren <i>et al.</i> 2017 (28135244) | Removed after LD clumping |
| rs11643209 | 16   | 75331044      | G     | T    | NA           | -0.222 | 0.06           | 6.30E-04 | Warren <i>et al.</i> 2017 (28135244) | Removed after LD clumping |
| rs12941318 | 17   | 1333598       | C     | T    | NA           | -0.226 | 0.07           | 6.90E-04 | Warren <i>et al.</i> 2017 (28135244) |                           |
| rs2467099  | 17   | 73949045      | C     | T    | NA           | -0.216 | 0.07           | 3.60E-03 | Warren <i>et al.</i> 2017 (28135244) |                           |

For Single Nucleotide Polymorphisms (SNPs) found by Ehret *et al.* the Beta, standard error and *P* value from the Stage 4 meta-analysis for the novel loci, rather than the results that include UK Biobank data were used. For SNPs found by Hoffman *et al.* we used betas, standard error and *P* value from the GRA+ICBP cohort if the SNP had a *P* value < 5E<sup>-8</sup>. For SNPs found by Warren *et al.* we used the Beta, standard error and *P* values that did not include UK Biobank data, but which were found in the combined GWAS with a *P* value < 5E<sup>-8</sup>. SNPs found by Hoffman *et al.*, Surendran *et al.*, Kato *et al.*, and Liu *et al.* include SNPs from analyses that included both European and non-European populations.



**eTable 5.** Single-nucleotide polymorphisms used to build the genetic risk score for type 2 diabetes

| SNP rsID   | Chr. | hg19 position | NEFAL | EFAL | EF Frequency | Beta            | Standard Error | P value  | Study, year (PMID)                      | Comment                         |
|------------|------|---------------|-------|------|--------------|-----------------|----------------|----------|-----------------------------------------|---------------------------------|
| rs340874   | 1    | 214159256     | T     | C    | 0.52         | 0.06765<br>8648 | 0.010980642    | 7.20E-10 | Dupuis <i>et al.</i> 2010<br>(20081858) |                                 |
| rs780094   | 2    | 27741237      | T     | C    | 0.62         | 0.05826<br>8908 | 0.009603609    | 1.30E-09 | Dupuis <i>et al.</i> 2010<br>(20081858) |                                 |
| rs11708067 | 3    | 123065778     | G     | A    | 0.78         | 0.11332<br>8685 | 0.012137449    | 9.90E-21 | Dupuis <i>et al.</i> 2010<br>(20081858) |                                 |
| rs2191349  | 7    | 15064309      | G     | T    | 0.52         | 0.05826<br>8908 | 0.010196602    | 1.10E-08 | Dupuis <i>et al.</i> 2010<br>(20081858) |                                 |
| rs13266634 | 8    | 118184783     | T     | C    | 0.29         | 0.13976<br>1942 | 0.024686104    | 1.50E-08 | Dupuis <i>et al.</i> 2010<br>(20081858) |                                 |
| rs7903146  | 10   | 114758349     | C     | T    | 0.31         | 0.33647<br>2237 | 0.022312808    | 2.20E-51 | Dupuis <i>et al.</i> 2010<br>(20081858) |                                 |
| rs10830963 | 11   | 92708710      | C     | G    | 0.3          | 0.08617<br>7696 | 0.012034049    | 8.00E-13 | Dupuis <i>et al.</i> 2010<br>(20081858) | Removed<br>after LD<br>clumping |
| rs13389219 | 2    | 165528876     | T     | C    | 0.6          | 0.06765<br>8648 | 0.01180629     | 1.00E-08 | Morris <i>et al.</i> 2012<br>(22885922) |                                 |
| rs459193   | 5    | 55806751      | A     | G    | 0.7          | 0.07696<br>1041 | 0.013230917    | 6.00E-09 | Morris <i>et al.</i> 2012<br>(22885922) |                                 |
| rs516946   | 8    | 41519248      | T     | C    | 0.76         | 0.08617<br>7696 | 0.013620661    | 2.50E-10 | Morris <i>et al.</i> 2012<br>(22885922) |                                 |
| rs2796441  | 9    | 84308948      | A     | G    | 0.57         | 0.06765<br>8648 | 0.0115966      | 5.40E-09 | Morris <i>et al.</i> 2012<br>(22885922) |                                 |
| rs12571751 | 10   | 80942631      | G     | A    | 0.52         | 0.07696<br>1041 | 0.011900669    | 1.00E-10 | Morris <i>et al.</i> 2012<br>(22885922) |                                 |
| rs10842994 | 12   | 27965150      | T     | C    | 0.8          | 0.09531<br>018  | 0.015402856    | 6.10E-10 | Morris <i>et al.</i> 2012<br>(22885922) |                                 |
| rs7177055  | 15   | 77832762      | G     | A    | 0.68         | 0.07696<br>1041 | 0.013130972    | 4.60E-09 | Morris <i>et al.</i> 2012<br>(22885922) |                                 |
| rs7202877  | 16   | 75247245      | G     | T    | 0.89         | 0.11332<br>8685 | 0.020551461    | 3.50E-08 | Morris <i>et al.</i> 2012<br>(22885922) |                                 |
| rs12970134 | 18   | 57884750      | G     | A    | 0.27         | 0.07696<br>1041 | 0.013502586    | 1.20E-08 | Morris <i>et al.</i> 2012<br>(22885922) |                                 |
| rs10401969 | 19   | 19407718      | T     | C    | 0.08         | 0.12221<br>7633 | 0.021105029    | 7.00E-09 | Morris <i>et al.</i> 2012<br>(22885922) |                                 |

| SNP rsID   | Chr. | hg19 position | NEFAL | EFAL | EF Frequency | Beta            | Standard Error | P value  | Study, year (PMID)                       | Comment |
|------------|------|---------------|-------|------|--------------|-----------------|----------------|----------|------------------------------------------|---------|
| rs243021   | 2    | 60584819      | G     | A    | 0.46         | 0.07696<br>1041 | 0.009747906    | 2.90E-15 | Voight <i>et al.</i> 2011<br>(20581827)  |         |
| rs7578326  | 2    | 227020653     | G     | A    | 0.64         | 0.10436<br>0015 | 0.011398349    | 5.40E-20 | Voight <i>et al.</i> 2011<br>(20581827)  |         |
| rs4457053  | 5    | 76424949      | A     | G    | 0.26         | 0.07696<br>1041 | 0.011014239    | 2.80E-12 | Voight <i>et al.</i> 2011<br>(20581827)  |         |
| rs972283   | 7    | 130466854     | A     | G    | 0.55         | 0.06765<br>8648 | 0.010660466    | 2.20E-10 | Voight <i>et al.</i> 2011<br>(20581827)  |         |
| rs896854   | 8    | 95960511      | C     | T    | 0.48         | 0.05826<br>8908 | 0.009535064    | 9.90E-10 | Voight <i>et al.</i> 2011<br>(20581827)  |         |
| rs13292136 | 9    | 81952128      | T     | C    | 0.93         | 0.10436<br>0015 | 0.018791744    | 2.80E-08 | Voight <i>et al.</i> 2011<br>(20581827)  |         |
| rs231362   | 11   | 2691471       | A     | G    | 0.52         | 0.07696<br>1041 | 0.010537295    | 2.80E-13 | Voight <i>et al.</i> 2011<br>(20581827)  |         |
| rs1552224  | 11   | 72433098      | C     | A    | 0.88         | 0.13102<br>8262 | 0.013400364    | 1.40E-22 | Voight <i>et al.</i> 2011<br>(20581827)  |         |
| rs1387153  | 11   | 92673828      | C     | T    | 0.28         | 0.08617<br>7696 | 0.011089957    | 7.80E-15 | Voight <i>et al.</i> 2011<br>(20581827)  |         |
| rs1531343  | 12   | 66174894      | G     | C    | 0.1          | 0.09531<br>018  | 0.016149897    | 3.60E-09 | Voight <i>et al.</i> 2011<br>(20581827)  |         |
| rs7957197  | 12   | 121460686     | A     | T    | 0.85         | 0.06765<br>8648 | 0.01212439     | 2.40E-08 | Voight <i>et al.</i> 2011<br>(20581827)  |         |
| rs11634397 | 15   | 80432222      | A     | G    | 0.6          | 0.05826<br>8908 | 0.009763358    | 2.40E-09 | Voight <i>et al.</i> 2011<br>(20581827)  |         |
| rs8042680  | 15   | 91521337      | C     | A    | 0.22         | 0.06765<br>8648 | 0.010683031    | 2.40E-10 | Voight <i>et al.</i> 2011<br>(20581827)  |         |
| rs10923931 | 1    | 120517959     | G     | T    | 0.106        | 0.12221<br>7633 | 0.022276108    | 4.10E-08 | Zeggini <i>et al.</i> 2008<br>(18372903) |         |
| rs7578597  | 2    | 43732823      | C     | T    | 0.902        | 0.13976<br>1942 | 0.022933676    | 1.10E-09 | Zeggini <i>et al.</i> 2008<br>(18372903) |         |
| rs17036101 | 3    | 12277845      | A     | G    | 0.927        | 0.13976<br>1942 | 0.026880721    | 2.00E-07 | Zeggini <i>et al.</i> 2008<br>(18372903) |         |
| rs4607103  | 3    | 64711904      | T     | C    | 0.761        | 0.08617<br>7696 | 0.01511962     | 1.20E-08 | Zeggini <i>et al.</i> 2008<br>(18372903) |         |
| rs9472138  | 6    | 43811762      | C     | T    | 0.282        | 0.05826<br>8908 | 0.012635887    | 4.00E-06 | Zeggini <i>et al.</i> 2008<br>(18372903) |         |
| rs864745   | 7    | 28180556      | C     | T    | 0.501        | 0.09531         | 0.01265417     | 5.00E-14 | Zeggini <i>et al.</i> 2008               |         |

| SNP rsID   | Chr. | hg19 position | NEFAL | EFAL | EF Frequency | Beta            | Standard Error | P value  | Study, year (PMID)                       | Comment                         |
|------------|------|---------------|-------|------|--------------|-----------------|----------------|----------|------------------------------------------|---------------------------------|
|            |      |               |       |      |              | 018             |                |          | (18372903)                               |                                 |
| rs12779790 | 10   | 12328010      | A     | G    | 0.183        | 0.10436<br>0015 | 0.016206651    | 1.20E-10 | Zeggini <i>et al.</i> 2008<br>(18372903) |                                 |
| rs1153188  | 12   | 55098996      | T     | A    | 0.733        | 0.07696<br>1041 | 0.014746634    | 1.80E-07 | Zeggini <i>et al.</i> 2008<br>(18372903) |                                 |
| rs7961581  | 12   | 71663102      | T     | C    | 0.269        | 0.08617<br>7696 | 0.014140984    | 1.10E-09 | Zeggini <i>et al.</i> 2008<br>(18372903) |                                 |
| rs2641348  | 1    | 120437884     | A     | G    | 0.107        | 0.09531<br>018  | 0.018802717    | 4.00E-07 | Zeggini <i>et al.</i> 2008<br>(18372903) | Removed<br>after LD<br>clumping |
| rs10490072 | 2    | 60669931      | C     | T    | 0.724        | 0.04879<br>0164 | 0.012540551    | 1.00E-04 | Zeggini <i>et al.</i> 2008<br>(18372903) | Removed<br>after LD<br>clumping |

Single Nucleotide Polymorphisms (SNPs) were selected from analyses that included European ancestry populations, except those found by Morris *et al.* which included both European and non-European populations.

**eTable 6.** Diet component definitions used in the UK Biobank study

| Diet component            | Intake goal      | Field IDs                                                                                                                                                                                                       | Amount per serving                                                                |
|---------------------------|------------------|-----------------------------------------------------------------------------------------------------------------------------------------------------------------------------------------------------------------|-----------------------------------------------------------------------------------|
| Fruit                     | 3 servings/day   | 1309 (pieces fresh fruit/day)<br>1319 (pieces dried fruit/day)                                                                                                                                                  | 1309 – 1 piece<br>1319 – 5 pieces                                                 |
| Vegetable                 | 3 servings/day   | 1289 (tablespoons cooked vegetables/day)<br>1299 (salad/raw vegetables/day)                                                                                                                                     | 3 heaped tablespoons                                                              |
| Whole grains              | 3 servings/day   | 1438, 1448 (wholemeal/wholegrain bread slices/week)<br>1458, 1468 (bran/oat/muesli cereal bowls/week)                                                                                                           | 1438/1448 – 1 slice/day<br>1458/1468 – 1 bowl/day                                 |
| (Shell)fish               | ≥2 servings/week | 1329 (oily fish/week)<br>1339 (non-oily fish/week)                                                                                                                                                              | Once/week                                                                         |
| Dairy                     | 2 servings/day   | 1408 (cheese/week)<br>1418 (milk type)                                                                                                                                                                          | 1408 – 1 piece/day<br>1418 – 1 glass/day if consumption of any type of milk       |
| Vegetable oils            | 2 servings/day   | 1428 (Flora Pro-Active/Benecol spread)<br>2654 (Flora Pro-Active/Benecol, soft margarine -, olive oil based -, polyunsaturated/sunflower oil based -, other low/reduced fat spread)<br>1438 (bread slices/week) | 1 serving/day if in combination with eating at least 2 slices of bread (ID 1438)  |
| Refined grains            | ≤2 servings/day  | 1438, 1448 (white, brown, other bread slices/week)<br>1458, 1468 (biscuit, other cereals/week)                                                                                                                  | 1438/1448 – 1 slice/day<br>1458/1468 – 1 bowl/day                                 |
| Processed meats           | ≤1 serving/week  | 1349 (processed meat/week or daily)<br>3680 (age when last ate meat)                                                                                                                                            | 1349 – 1 piece/day<br>3680 – 0 pieces/day if indicated having never eaten meat    |
| Unprocessed meats         | ≤2 serving/wk    | 1359 (poultry/week or day)<br>1369 (beef/week or day)<br>1379 (lamb or mutton/week or day)<br>1389 (pork/week or day)<br>3680 (age when last ate meat)                                                          | 1359-1389 – once/week<br>3680 – 0 pieces/day if indicated having never eaten meat |
| Sugar-sweetened beverages | Don't drink      | 6144 (never consumes drinks containing sugar)                                                                                                                                                                   | Only 0 servings were possible here.                                               |

Field IDs and serving sizes used per diet component in UK Biobank with available data from the general baseline questionnaire. If participants achieved the intake goal they were considered to have an adequate intake of the diet component. Adequate intake of at least half of all diet components was considered as an ideal diet, less than half was considered a poor diet.

**eTable 7.** Disease definitions used in the UK Biobank study

| <b>Variable</b>          | <b>ICD-9</b>                                                                           | <b>ICD-10</b>                                                      | <b>OPCS-4</b>               | <b>Self-reported fields</b>                              |
|--------------------------|----------------------------------------------------------------------------------------|--------------------------------------------------------------------|-----------------------------|----------------------------------------------------------|
| Coronary Artery Disease  | 410, 412, 414                                                                          | I21-25, Z951, Z955                                                 | K40-K46, K49, K50, K75      | 6150(1), 3894, 20004(1070, 1095, 1523)                   |
| Atrial Fibrillation      | 4273                                                                                   | I48                                                                | K621-K623                   | 20002(1471, 1483)                                        |
| Stroke                   | 3361, 36231, 36232, 430, 431, 4329, 43301, 43311, 43321, 43331, 43381, 43391, 434, 436 | I60, I61, I629, I63, I64, I678, I690, I693, G951, H341, H342, S066 | A052-A054, L351, L353, L343 | 6150(3), 4056, 20002(1081, 1491, 1583, 1086)             |
| Hypertension             | 401-405                                                                                | I10-I13, I15, O10                                                  |                             | 2966, 6150(4), 6153(2), 6177(2), 20002(1065, 1072)       |
| Diabetes Mellitus Type 2 | 250                                                                                    | E10-E14                                                            |                             | 2443(1), 2976, 6153(3), 6177(3), 20002(1220, 1222, 1223) |

Variable definitions constructed using ICD-9, ICD-10 and OPCS-4 codes as well as self-reported data fields with choice-, disease- or procedure-specific codes between brackets are shown. Abbreviations: ICD, International Classification of Diseases; OPCS, Office of Population, Censuses and Surveys: Classification of interventions and Procedures

**eTable 8.** Baseline characteristics per lifestyle category and genetic risk group of coronary artery disease

| Characteristics                       | Low Genetic Risk                      |                                              |                                      | Intermediate Genetic Risk             |                                              |                                      | High Genetic risk                     |                                              |                                      |
|---------------------------------------|---------------------------------------|----------------------------------------------|--------------------------------------|---------------------------------------|----------------------------------------------|--------------------------------------|---------------------------------------|----------------------------------------------|--------------------------------------|
|                                       | Ideal lifestyle<br>Mean±SD or No. (%) | Intermediate lifestyle<br>Mean±SD or No. (%) | Poor lifestyle<br>Mean±SD or No. (%) | Ideal lifestyle<br>Mean±SD or No. (%) | Intermediate lifestyle<br>Mean±SD or No. (%) | Poor lifestyle<br>Mean±SD or No. (%) | Ideal lifestyle<br>Mean±SD or No. (%) | Intermediate lifestyle<br>Mean±SD or No. (%) | Poor lifestyle<br>Mean±SD or No. (%) |
| N total                               | 13,648                                | 49,079                                       | 3,264                                | 40,632                                | 145,208                                      | 9,869                                | 13,113                                | 47,144                                       | 3,176                                |
| Age, y                                | 56.16±8.11                            | 56.95±7.96                                   | 56.57±7.77                           | 56.07±8.13                            | 56.85±7.96                                   | 56.15±7.82                           | 55.95±8.08                            | 56.62±7.98                                   | 55.83±7.75                           |
| Female                                | 8,795 (64.4)                          | 25,279 (51.5)                                | 1,789 (54.8)                         | 26,479 (65.2)                         | 75,261 (51.8)                                | 5,467 (55.4)                         | 8,572 (65.4)                          | 25,047 (53.1)                                | 1,806 (56.9)                         |
| Systolic blood pressure, mm Hg        | 128.9±17.6                            | 134.2±17.7                                   | 135.2±17.5                           | 129.5±18.0                            | 134.7±17.8                                   | 135.6±17.5                           | 130.1±17.9                            | 135.1±17.9                                   | 136.1±17.9                           |
| Diastolic blood pressure, mm Hg       | 79.4±8.2                              | 82.7±8.5                                     | 84.2±8.6                             | 79.6±8.3                              | 82.8±8.4                                     | 84.5±8.4                             | 79.8±8.2                              | 83.0±8.5                                     | 84.7±8.6                             |
| Smoking                               |                                       |                                              |                                      |                                       |                                              |                                      |                                       |                                              |                                      |
| Ideal (never or stopped >1 year ago)  | 12,462 (91.3)                         | 23,340 (47.6)                                | 881 (27.0)                           | 37,174 (91.5)                         | 69,286 (47.7)                                | 2,541 (25.7)                         | 12,009 (91.6)                         | 22,392 (47.5)                                | 821 (25.9)                           |
| Intermediate (stopped <1 year ago)    | 980 (7.2)                             | 21,220 (43.2)                                | 647 (19.8)                           | 2904 (7.1)                            | 62,531 (43.1)                                | 1,887 (19.1)                         | 894 (6.8)                             | 20,364 (43.2)                                | 656 (20.7)                           |
| Poor (current smoker)                 | 206 (1.5)                             | 4,519 (9.2)                                  | 1,736 (53.2)                         | 554 (1.4)                             | 13,391 (9.2)                                 | 5,441 (55.1)                         | 210 (1.6)                             | 4388 (9.3)                                   | 1,699 (53.5)                         |
| Body Mass Index, kg/m <sup>2</sup>    | 23.73±3.00                            | 27.96±4.33                                   | 33.17±5.34                           | 23.76±3.02                            | 27.97±4.35                                   | 33.10±5.26                           | 23.77±3.00                            | 27.99±4.34                                   | 33.27±5.27                           |
| Ideal (18.5 – 24.9)                   | 11,588 (84.9)                         | 10,390 (21.2)                                | 214 (6.6)                            | 34,377 (84.6)                         | 30,495 (21.0)                                | 641 (6.5)                            | 11,168 (85.2)                         | 9902 (21.0)                                  | 191 (6.0)                            |
| Intermediate (25 - 29.9)              | 1,494 (10.9)                          | 26,651 (54.3)                                | 251 (7.7)                            | 4,435 (10.9)                          | 78,738 (54.2)                                | 831 (8.4)                            | 1,361 (10.4)                          | 25,480 (54.0)                                | 256 (8.1)                            |
| Poor (≥30)                            | 566 (4.1)                             | 12,038 (24.5)                                | 2,799 (85.8)                         | 1,820 (4.5)                           | 35,975 (24.8)                                | 8,397 (85.1)                         | 584 (4.5)                             | 11,762 (24.9)                                | 2,729 (85.9)                         |
| Physical activity                     |                                       |                                              |                                      |                                       |                                              |                                      |                                       |                                              |                                      |
| Ideal (regular physical activity)     | 13,261 (97.2)                         | 31,036 (63.2)                                | 627 (19.2)                           | 39,436 (97.1)                         | 91,678 (63.1)                                | 2,006 (20.3)                         | 12,746 (97.2)                         | 29,709 (63.0)                                | 596 (18.8)                           |
| Intermediate (some physical activity) | 319 (2.3)                             | 15,619 (31.8)                                | 413 (12.7)                           | 1,015 (2.5)                           | 46,248 (31.8)                                | 1,234 (12.5)                         | 318 (2.4)                             | 15,028 (31.9)                                | 413 (13.0)                           |
| Poor (no regular physical activity)   | 68 (0.5)                              | 2,424 (4.9)                                  | 2,224 (68.1)                         | 181 (0.4)                             | 7,282 (5.0)                                  | 6,629 (67.2)                         | 49 (0.4)                              | 2,407 (5.1)                                  | 2,167 (68.2)                         |
| Diet                                  |                                       |                                              |                                      |                                       |                                              |                                      |                                       |                                              |                                      |
| Ideal                                 | 5,402 (39.6)                          | 3,720 (7.6)                                  | 27 (0.8)                             | 16,134 (39.7)                         | 11,029 (7.6)                                 | 56 (0.6)                             | 5,084 (38.8)                          | 3,749 (8.0)                                  | 20 (0.6)                             |

| Characteristics    | Low Genetic Risk                      |                                              |                                      | Intermediate Genetic Risk             |                                              |                                      | High Genetic risk                     |                                              |                                      |
|--------------------|---------------------------------------|----------------------------------------------|--------------------------------------|---------------------------------------|----------------------------------------------|--------------------------------------|---------------------------------------|----------------------------------------------|--------------------------------------|
|                    | Ideal lifestyle<br>Mean±SD or No. (%) | Intermediate lifestyle<br>Mean±SD or No. (%) | Poor lifestyle<br>Mean±SD or No. (%) | Ideal lifestyle<br>Mean±SD or No. (%) | Intermediate lifestyle<br>Mean±SD or No. (%) | Poor lifestyle<br>Mean±SD or No. (%) | Ideal lifestyle<br>Mean±SD or No. (%) | Intermediate lifestyle<br>Mean±SD or No. (%) | Poor lifestyle<br>Mean±SD or No. (%) |
| Poor               | 8,246 (60.4)                          | 45,359 (92.4)                                | 3,237 (99.2)                         | 24,498 (60.3)                         | 134,179 (92.4)                               | 9,813 (99.4)                         | 8,029 (61.2)                          | 43,395 (92.0)                                | 3,156 (99.4)                         |
| Years in education | 15.96±4.56                            | 14.68±4.79                                   | 12.41±4.69                           | 15.91±4.56                            | 14.67±4.77                                   | 12.46±4.67                           | 15.94±4.55                            | 14.68±4.77                                   | 12.52±4.73                           |
| Income, £          |                                       |                                              |                                      |                                       |                                              |                                      |                                       |                                              |                                      |
| <18,000            | 1,923 (14.1)                          | 9,041 (18.4)                                 | 951 (29.1)                           | 5,978 (14.7)                          | 26,658 (18.4)                                | 3,091 (31.3)                         | 1,889 (14.4)                          | 8,620 (18.3)                                 | 950 (29.9)                           |
| 18,000 – 30,999    | 2,929 (21.5)                          | 11,102 (22.6)                                | 711 (21.8)                           | 8,556 (21.1)                          | 32,562 (22.4)                                | 2,029 (20.6)                         | 2,809 (21.4)                          | 10,636 (22.6)                                | 677 (21.3)                           |
| 31,000 – 51,999    | 3,183 (23.3)                          | 11,323 (23.1)                                | 573 (17.6)                           | 9,774 (24.1)                          | 33,956 (23.4)                                | 1,726 (17.5)                         | 3,176 (24.2)                          | 11,176 (23.7)                                | 542 (17.1)                           |
| 52,000 – 100,000   | 2,903 (21.3)                          | 8,844 (18.0)                                 | 329 (10.1)                           | 8,447 (20.8)                          | 26,387 (18.2)                                | 1,011 (10.2)                         | 2,758 (21.0)                          | 8,486 (18.0)                                 | 315 (9.9)                            |
| >100,000           | 895 (6.6)                             | 2,240 (4.6)                                  | 53 (1.6)                             | 2,580 (6.3)                           | 6,544 (4.5)                                  | 197 (2.0)                            | 796 (6.1)                             | 2,143 (4.5)                                  | 54 (1.7)                             |
| Unknown            | 1,815 (13.3)                          | 6,529 (13.3)                                 | 647 (19.8)                           | 5,297 (13.0)                          | 19,101 (13.2)                                | 1,815 (18.4)                         | 1,685 (12.8)                          | 6,083 (12.9)                                 | 638 (20.1)                           |

Lifestyle was defined as ideal if 3 or more ideal lifestyle factors were present, poor if 3 or more poor lifestyle factors were present, or as intermediate (all other combinations). Ideal diet was defined as adequate intake of at least 5 dietary components. Poor diet was defined as inadequate intake of at least 5 dietary components.

**eTable 9.** Baseline characteristics per lifestyle category and genetic risk group of atrial fibrillation

| Characteristics                       | Low Genetic Risk                         |                                                 |                                         | Intermediate Genetic Risk                |                                                 |                                         | High Genetic risk                        |                                                 |                                         |
|---------------------------------------|------------------------------------------|-------------------------------------------------|-----------------------------------------|------------------------------------------|-------------------------------------------------|-----------------------------------------|------------------------------------------|-------------------------------------------------|-----------------------------------------|
|                                       | Ideal lifestyle<br>Mean±SD<br>or No. (%) | Intermediate lifestyle<br>Mean±SD or<br>No. (%) | Poor lifestyle<br>Mean±SD<br>or No. (%) | Ideal lifestyle<br>Mean±SD<br>or No. (%) | Intermediate lifestyle<br>Mean±SD or<br>No. (%) | Poor lifestyle<br>Mean±SD<br>or No. (%) | Ideal lifestyle<br>Mean±SD<br>or No. (%) | Intermediate lifestyle<br>Mean±SD or<br>No. (%) | Poor lifestyle<br>Mean±SD<br>or No. (%) |
| N total                               | 13,496                                   | 49,804                                          | 3,466                                   | 41,154                                   | 150,668                                         | 10,527                                  | 13,302                                   | 47,830                                          | 3,390                                   |
| Age, y                                | 56.21±8.15                               | 56.99±8.01                                      | 56.39±7.65                              | 56.08±8.10                               | 57.00±7.94                                      | 56.40±7.81                              | 56.14±8.17                               | 56.91±7.96                                      | 56.56±7.85                              |
| Female                                | 8,729 (64.7)                             | 25,347 (50.9)                                   | 1,864 (53.8)                            | 26,657 (64.8)                            | 76,880 (51.0)                                   | 5,622 (53.4)                            | 8,575 (64.5)                             | 24,610 (51.5)                                   | 1,870 (55.2)                            |
| Systolic blood pressure, mm Hg        | 129.7±18.1                               | 134.9±17.8                                      | 135.7±17.3                              | 129.6±17.8                               | 134.8±17.8                                      | 135.5±17.6                              | 129.4±18.1                               | 134.5±17.7                                      | 135.6±17.9                              |
| Diastolic blood pressure, mm Hg       | 79.6±8.3                                 | 82.8±8.5                                        | 84.3±8.5                                | 79.6±8.2                                 | 82.7±8.4                                        | 84.1±8.6                                | 79.5±8.3                                 | 82.6±8.4                                        | 84.1±8.7                                |
| Smoking                               |                                          |                                                 |                                         |                                          |                                                 |                                         |                                          |                                                 |                                         |
| Ideal (never or stopped >1 year ago)  | 12,365 (91.6)                            | 23,532 (47.2)                                   | 883 (25.5)                              | 37,592 (91.3)                            | 70,889 (47.0)                                   | 2,670 (25.4)                            | 12,172 (91.5)                            | 22,447 (46.9)                                   | 828 (24.4)                              |
| Intermediate (stopped <1 year ago)    | 927 (6.9)                                | 21,747 (43.7)                                   | 732 (21.1)                              | 2,977 (7.2)                              | 65,931 (43.8)                                   | 2,123 (20.2)                            | 941 (7.1)                                | 20,770 (43.4)                                   | 694 (20.5)                              |
| Poor (current smoker)                 | 204 (1.5)                                | 4,525 (9.1)                                     | 1,851 (53.4)                            | 585 (1.4)                                | 13,848 (9.2)                                    | 5,734 (54.5)                            | 189 (1.4)                                | 4,613 (9.6)                                     | 1,868 (55.1)                            |
| Body Mass Index, kg/m <sup>2</sup>    | 23.79±3.06                               | 28.04±4.36                                      | 33.20±5.25                              | 23.78±3.04                               | 28.02±4.34                                      | 33.20±5.31                              | 23.72±2.94                               | 27.97±4.33                                      | 32.93±5.22                              |
| Ideal (18.5 – 24.9)                   | 11,370 (84.2)                            | 10,215 (20.5)                                   | 214 (6.2)                               | 34,821 (84.6)                            | 31,224 (20.7)                                   | 678 (6.4)                               | 11,303 (85.0)                            | 10,079 (21.1)                                   | 226 (6.7)                               |
| Intermediate (25 - 29.9)              | 1,497 (11.1)                             | 27,116 (54.4)                                   | 286 (8.3)                               | 4,470 (10.9)                             | 81,459 (54.1)                                   | 849 (8.1)                               | 1,454 (10.9)                             | 25,946 (54.2)                                   | 308 (9.1)                               |
| Poor (≥30)                            | 629 (4.7)                                | 12,473 (25.0)                                   | 2,966 (85.6)                            | 1,863 (4.5)                              | 37,985 (25.2)                                   | 9,000 (85.5)                            | 545 (4.1)                                | 11,805 (24.7)                                   | 2,856 (84.2)                            |
| Physical activity                     |                                          |                                                 |                                         |                                          |                                                 |                                         |                                          |                                                 |                                         |
| Ideal (regular physical activity)     | 13,137 (97.3)                            | 31,328 (62.9)                                   | 682 (19.7)                              | 39,903 (97.0)                            | 95,255 (63.2)                                   | 2,054 (19.5)                            | 12,946 (97.3)                            | 30,064 (62.9)                                   | 648 (19.1)                              |
| Intermediate (some physical activity) | 309 (2.3)                                | 15,918 (32.0)                                   | 424 (12.2)                              | 1,055 (2.6)                              | 47,819 (31.7)                                   | 1,347 (12.8)                            | 304 (2.3)                                | 15,347 (32.1)                                   | 421 (12.4)                              |
| Poor (no regular physical activity)   | 50 (0.4)                                 | 2,558 (5.1)                                     | 2,360 (68.1)                            | 196 (0.5)                                | 7,594 (5.0)                                     | 7,126 (67.7)                            | 52 (0.4)                                 | 2,419 (5.1)                                     | 2,321 (68.5)                            |
| Diet                                  |                                          |                                                 |                                         |                                          |                                                 |                                         |                                          |                                                 |                                         |
| Ideal                                 | 5,356 (39.7)                             | 3,941 (7.9)                                     | 27 (0.8)                                | 16,377 (39.8)                            | 11,701 (7.8)                                    | 60 (0.6)                                | 5,244 (39.4)                             | 3,671 (7.7)                                     | 27 (0.8)                                |



|                    | Low Genetic Risk   |                        |                    | Intermediate Genetic Risk |                        |                    | High Genetic risk  |                        |                    |
|--------------------|--------------------|------------------------|--------------------|---------------------------|------------------------|--------------------|--------------------|------------------------|--------------------|
|                    | Ideal lifestyle    | Intermediate lifestyle | Poor lifestyle     | Ideal lifestyle           | Intermediate lifestyle | Poor lifestyle     | Ideal lifestyle    | Intermediate lifestyle | Poor lifestyle     |
| Characteristics    | Mean±SD or No. (%) | Mean±SD or No. (%)     | Mean±SD or No. (%) | Mean±SD or No. (%)        | Mean±SD or No. (%)     | Mean±SD or No. (%) | Mean±SD or No. (%) | Mean±SD or No. (%)     | Mean±SD or No. (%) |
| Poor               | 8,140 (60.3)       | 45,863 (92.1)          | 3,439 (99.2)       | 24,777 (60.2)             | 138,967 (92.2)         | 10,467 (99.4)      | 8,058 (60.6)       | 44,159 (92.3)          | 3,363 (99.2)       |
| Years in education | 15.94±4.57         | 14.64±4.80             | 12.53±4.67         | 15.89±4.57                | 14.61±4.79             | 12.34±4.70         | 15.95±4.57         | 14.60±4.79             | 12.25±4.67         |
| Income, £          |                    |                        |                    |                           |                        |                    |                    |                        |                    |
| <18,000            | 2,062 (15.3)       | 9,318 (18.7)           | 1,076 (31.0)       | 5,972 (14.5)              | 28,497 (18.9)          | 3,349 (31.8)       | 1,930 (14.5)       | 8,997 (18.8)           | 1,090 (32.2)       |
| 18,000 – 30,999    | 2,859 (21.2)       | 11,264 (22.6)          | 742 (21.4)         | 8,772 (21.3)              | 33,987 (22.6)          | 2,162 (20.5)       | 2,809 (21.1)       | 10,783 (22.5)          | 704 (20.8)         |
| 31,000 – 51,999    | 3,152 (23.4)       | 11,445 (23.0)          | 573 (16.5)         | 9,862 (24.0)              | 34,956 (23.2)          | 1,791 (17.0)       | 3,174 (23.9)       | 11,090 (23.2)          | 574 (16.9)         |
| 52,000 – 100,000   | 2,795 (20.7)       | 8,947 (18.0)           | 355 (10.2)         | 8,605 (20.9)              | 26,751 (17.8)          | 1,039 (9.9)        | 2,776 (20.9)       | 8,537 (17.8)           | 298 (8.8)          |
| >100,000           | 864 (6.4)          | 2,202 (4.4)            | 65 (1.9)           | 2,564 (6.2)               | 6,667 (4.4)            | 178 (1.7)          | 853 (6.4)          | 2,111 (4.4)            | 75 (2.2)           |
| Unknown            | 1,764 (13.1)       | 6,628 (13.3)           | 655 (18.9)         | 5,379 (13.1)              | 19,810 (13.1)          | 2,008 (19.1)       | 1,760 (13.2)       | 6,312 (13.2)           | 649 (19.1)         |

Lifestyle was defined as ideal if 3 or more ideal lifestyle factors were present, poor if 3 or more poor lifestyle factors were present, or as intermediate (all other combinations). Ideal diet was defined as adequate intake of at least 5 dietary components. Poor diet was defined as inadequate intake of at least 5 dietary components.

**eTable 10.** Baseline characteristics per lifestyle category and genetic risk group of stroke

| Characteristics                       | Low Genetic Risk                         |                                                 |                                         | Intermediate Genetic Risk                |                                                 |                                         | High Genetic risk                        |                                                 |                                         |
|---------------------------------------|------------------------------------------|-------------------------------------------------|-----------------------------------------|------------------------------------------|-------------------------------------------------|-----------------------------------------|------------------------------------------|-------------------------------------------------|-----------------------------------------|
|                                       | Ideal lifestyle<br>Mean±SD<br>or No. (%) | Intermediate lifestyle<br>Mean±SD or<br>No. (%) | Poor lifestyle<br>Mean±SD<br>or No. (%) | Ideal lifestyle<br>Mean±SD<br>or No. (%) | Intermediate lifestyle<br>Mean±SD or<br>No. (%) | Poor lifestyle<br>Mean±SD<br>or No. (%) | Ideal lifestyle<br>Mean±SD<br>or No. (%) | Intermediate lifestyle<br>Mean±SD or<br>No. (%) | Poor lifestyle<br>Mean±SD<br>or No. (%) |
| N total                               | 15,135                                   | 55,864                                          | 3,839                                   | 39,126                                   | 142,751                                         | 9,803                                   | 13,727                                   | 49,325                                          | 3,401                                   |
| Age, y                                | 56.21±8.17                               | 57.01±7.94                                      | 56.42±7.93                              | 56.12±8.12                               | 57.01±7.96                                      | 56.43±7.78                              | 56.08±8.11                               | 56.95±7.99                                      | 56.38±7.77                              |
| Female                                | 9,744 (64.4)                             | 28,285 (50.6)                                   | 2,055 (53.5)                            | 25,247 (64.5)                            | 72,675 (50.9)                                   | 5,240 (53.5)                            | 8,873 (64.6)                             | 25,235 (51.2)                                   | 1,852 (54.5)                            |
| Systolic blood pressure, mm Hg        | 129.4±17.9                               | 134.5±17.7                                      | 135.2±17.5                              | 129.6±17.9                               | 134.7±17.8                                      | 135.5±17.5                              | 129.6±17.9                               | 135.0±17.9                                      | 135.6±17.9                              |
| Diastolic blood pressure, mm Hg       | 79.5±8.1                                 | 82.7±8.4                                        | 84.1±8.6                                | 79.6±8.3                                 | 82.7±8.45                                       | 84.2±8.6                                | 79.6±8.3                                 | 82.8±8.5                                        | 84.1±8.7                                |
| Smoking                               |                                          |                                                 |                                         |                                          |                                                 |                                         |                                          |                                                 |                                         |
| Ideal (never or stopped >1 year ago)  | 13,835 (91.4)                            | 26,422 (47.3)                                   | 928 (24.2)                              | 35,751 (91.4)                            | 67,181 (47.1)                                   | 2,528 (25.8)                            | 12,586 (91.7)                            | 23,236 (47.1)                                   | 876 (25.8)                              |
| Intermediate (stopped <1 year ago)    | 1,083 (7.2)                              | 24,426 (43.7)                                   | 798 (20.8)                              | 2,813 (7.2)                              | 62,433 (43.7)                                   | 2,032 (20.7)                            | 952 (6.9)                                | 21,520 (43.6)                                   | 680 (20.0)                              |
| Poor (current smoker)                 | 217 (1.4)                                | 5,016 (9.0)                                     | 2,113 (55.0)                            | 562 (1.4)                                | 13,137 (9.2)                                    | 5,243 (53.5)                            | 189 (1.4)                                | 4,569 (9.3)                                     | 1,845 (54.2)                            |
| Body Mass Index, kg/m <sup>2</sup>    | 23.78±3.07                               | 28.04±4.33                                      | 33.09±5.12                              | 23.78±3.01                               | 28.01±4.35                                      | 33.23±5.28                              | 23.76±3.03                               | 28.00±4.36                                      | 33.24±5.44                              |
| Ideal (18.5 – 24.9)                   | 12,833 (84.8)                            | 11,392 (20.4)                                   | 251 (6.5)                               | 33,060 (84.5)                            | 29,716 (20.8)                                   | 611 (6.2)                               | 11,631 (84.7)                            | 10,258 (20.8)                                   | 206 (6.1)                               |
| Intermediate (25 - 29.9)              | 1,633 (10.8)                             | 30,380 (54.4)                                   | 296 (7.7)                               | 4,318 (11.0)                             | 77,198 (54.1)                                   | 764 (7.8)                               | 1,483 (10.8)                             | 26,753 (54.2)                                   | 314 (9.2)                               |
| Poor (≥30)                            | 669 (4.4)                                | 14,092 (25.2)                                   | 3,292 (85.8)                            | 1,748 (4.5)                              | 35,837 (25.1)                                   | 8,428 (86.0)                            | 613 (4.5)                                | 12,314 (25.0)                                   | 2,881 (84.7)                            |
| Physical activity                     |                                          |                                                 |                                         |                                          |                                                 |                                         |                                          |                                                 |                                         |
| Ideal (regular physical activity)     | 14,692 (97.1)                            | 35,274 (63.1)                                   | 787 (20.5)                              | 38,020 (97.2)                            | 90,193 (63.2)                                   | 1,898 (19.4)                            | 13,312 (97.0)                            | 31,197 (63.2)                                   | 659 (19.4)                              |
| Intermediate (some physical activity) | 387 (2.6)                                | 17,723 (31.7)                                   | 491 (12.8)                              | 928 (2.4)                                | 45,401 (31.8)                                   | 1,237 (12.6)                            | 348 (2.5)                                | 15,730 (31.9)                                   | 430 (12.6)                              |
| Poor (no regular physical activity)   | 56 (0.4)                                 | 2,867 (5.1)                                     | 2,561 (66.7)                            | 178 (0.5)                                | 7,157 (5.0)                                     | 6,668 (68.0)                            | 67 (0.5)                                 | 2,398 (4.9)                                     | 2,312 (68.0)                            |
| Diet                                  |                                          |                                                 |                                         |                                          |                                                 |                                         |                                          |                                                 |                                         |
| Ideal                                 | 5,973 (39.5)                             | 4,389 (7.9)                                     | 22 (0.6)                                | 15,580 (39.8)                            | 10,940 (7.7)                                    | 64 (0.7)                                | 5,435 (39.6)                             | 3,940 (8.0)                                     | 23 (0.7)                                |

| Characteristics    | Low Genetic Risk                      |                                              |                                      | Intermediate Genetic Risk             |                                              |                                      | High Genetic risk                     |                                              |                                      |
|--------------------|---------------------------------------|----------------------------------------------|--------------------------------------|---------------------------------------|----------------------------------------------|--------------------------------------|---------------------------------------|----------------------------------------------|--------------------------------------|
|                    | Ideal lifestyle<br>Mean±SD or No. (%) | Intermediate lifestyle<br>Mean±SD or No. (%) | Poor lifestyle<br>Mean±SD or No. (%) | Ideal lifestyle<br>Mean±SD or No. (%) | Intermediate lifestyle<br>Mean±SD or No. (%) | Poor lifestyle<br>Mean±SD or No. (%) | Ideal lifestyle<br>Mean±SD or No. (%) | Intermediate lifestyle<br>Mean±SD or No. (%) | Poor lifestyle<br>Mean±SD or No. (%) |
| Poor               | 9,162 (60.5)                          | 51,475 (92.1)                                | 3,817 (99.4)                         | 23,546 (60.2)                         | 131,811 (92.3)                               | 9,739 (99.3)                         | 8,292 (60.4)                          | 45,385 (92.0)                                | 3,378 (99.3)                         |
| Years in education | 15.91±4.56                            | 14.60±4.78                                   | 12.34±4.73                           | 15.93±4.56                            | 14.64±4.79                                   | 12.38±4.68                           | 15.89±4.58                            | 14.64±4.79                                   | 12.47±4.65                           |
| Income, £          |                                       |                                              |                                      |                                       |                                              |                                      |                                       |                                              |                                      |
| <18,000            | 2,279 (15.1)                          | 10,346 (18.5)                                | 1,198 (31.2)                         | 5,647 (14.4)                          | 26,799 (18.8)                                | 3,049 (31.1)                         | 1,998 (14.6)                          | 9,221 (18.7)                                 | 1,078 (31.7)                         |
| 18,000 – 30,999    | 3,222 (21.3)                          | 12,482 (22.3)                                | 823 (21.4)                           | 8,294 (21.2)                          | 32,371 (22.7)                                | 2,056 (21.0)                         | 2,937 (21.4)                          | 11,134 (22.6)                                | 696 (20.5)                           |
| 31,000 – 51,999    | 3,615 (23.9)                          | 12,997 (23.3)                                | 653 (17.0)                           | 9,374 (24.0)                          | 33,128 (23.2)                                | 1,639 (16.7)                         | 3,253 (23.7)                          | 11,451 (23.2)                                | 625 (18.4)                           |
| 52,000 – 100,000   | 3,113 (20.6)                          | 10,066 (18.0)                                | 365 (9.5)                            | 8,196 (20.9)                          | 25,474 (17.8)                                | 1,004 (10.2)                         | 2,874 (20.9)                          | 8,786 (17.8)                                 | 313 (9.2)                            |
| >100,000           | 892 (5.9)                             | 2,482 (4.4)                                  | 72 (1.9)                             | 2,495 (6.4)                           | 6,359 (4.5)                                  | 180 (1.8)                            | 908 (6.6)                             | 2,195 (4.5)                                  | 65 (1.9)                             |
| Unknown            | 2,014 (13.3)                          | 7,491 (13.4)                                 | 728 (19.0)                           | 5,120 (13.1)                          | 18,620 (13.0)                                | 1,875 (19.1)                         | 1,757 (12.8)                          | 6,538 (13.3)                                 | 624 (18.3)                           |

Lifestyle was defined as ideal if 3 or more ideal lifestyle factors were present, poor if 3 or more poor lifestyle factors were present, or as intermediate (all other combinations). Ideal diet was defined as adequate intake of at least 5 dietary components. Poor diet was defined as inadequate intake of at least 5 dietary components.

**eTable 11.** Baseline characteristics per lifestyle category and genetic risk group of hypertension

| Characteristics                       | Low Genetic Risk                      |                                              |                                      | Intermediate Genetic Risk             |                                              |                                      | High Genetic risk                     |                                              |                                      |
|---------------------------------------|---------------------------------------|----------------------------------------------|--------------------------------------|---------------------------------------|----------------------------------------------|--------------------------------------|---------------------------------------|----------------------------------------------|--------------------------------------|
|                                       | Ideal lifestyle<br>Mean±SD or No. (%) | Intermediate lifestyle<br>Mean±SD or No. (%) | Poor lifestyle<br>Mean±SD or No. (%) | Ideal lifestyle<br>Mean±SD or No. (%) | Intermediate lifestyle<br>Mean±SD or No. (%) | Poor lifestyle<br>Mean±SD or No. (%) | Ideal lifestyle<br>Mean±SD or No. (%) | Intermediate lifestyle<br>Mean±SD or No. (%) | Poor lifestyle<br>Mean±SD or No. (%) |
| N total                               | 11,323                                | 36,193                                       | 2,046                                | 33,583                                | 102,563                                      | 5,607                                | 10,666                                | 31,045                                       | 1,625                                |
| Age, y                                | 55.54±8.09                            | 55.95±8.04                                   | 54.82±7.92                           | 55.26±8.14                            | 55.66±8.06                                   | 54.62±7.86                           | 54.97±8.11                            | 55.28±8.09                                   | 54.25±7.89                           |
| Female                                | 7,369 (65.1)                          | 19,385 (53.6)                                | 1,186 (58.0)                         | 22,040 (65.6)                         | 55,151 (53.8)                                | 3,205 (57.2)                         | 7,011 (65.7)                          | 16,804 (54.1)                                | 938 (57.7)                           |
| Systolic blood pressure, mm Hg        | 124.4±16.3                            | 129.3±16.6                                   | 130.5±16.8                           | 127.0±16.7                            | 131.5±16.9                                   | 132.4±17.0                           | 129.3±16.9                            | 133.6±17.2                                   | 134.1±16.9                           |
| Diastolic blood pressure, mm Hg       | 77.6±7.7                              | 80.7±8.0                                     | 82.8±8.1                             | 78.6±7.7                              | 81.7±8.1                                     | 83.5±8.1                             | 79.7±7.9                              | 82.6±8.2                                     | 84.5±8.4                             |
| Smoking                               |                                       |                                              |                                      |                                       |                                              |                                      |                                       |                                              |                                      |
| Ideal (never or stopped >1 year ago)  | 10,372 (91.6)                         | 17,580 (48.6)                                | 459 (22.4)                           | 30,711 (91.4)                         | 48,963 (47.7)                                | 1,236 (22.0)                         | 9,748 (91.4)                          | 14,858 (47.9)                                | 348 (21.4)                           |
| Intermediate (stopped <1 year ago)    | 783 (6.9)                             | 15,010 (41.5)                                | 372 (18.2)                           | 2,385 (7.1)                           | 42,972 (41.9)                                | 859 (15.3)                           | 760 (7.1)                             | 12,815 (41.3)                                | 264 (16.2)                           |
| Poor (current smoker)                 | 168 (1.5)                             | 3,603 (10.0)                                 | 1,215 (59.4)                         | 487 (1.5)                             | 10,628 (10.4)                                | 3,512 (62.6)                         | 158 (1.5)                             | 3,372 (10.9)                                 | 1,013 (62.3)                         |
| Body Mass Index, kg/m <sup>2</sup>    | 23.56±2.69                            | 27.55±4.07                                   | 32.49±4.98                           | 23.48±2.66                            | 27.34±3.96                                   | 32.19±5.01                           | 23.39±2.63                            | 27.16±3.89                                   | 32.11±5.13                           |
| Ideal (18.5 – 24.9)                   | 9,854 (87.0)                          | 8,422 (23.3)                                 | 150 (7.3)                            | 29,348 (87.4)                         | 25,254 (24.6)                                | 504 (9.0)                            | 9,439 (88.5)                          | 8,063 (26.0)                                 | 152 (9.4)                            |
| Intermediate (25 - 29.9)              | 1,111 (9.8)                           | 20,110 (55.6)                                | 192 (9.4)                            | 3,265 (9.7)                           | 57,198 (55.8)                                | 556 (9.9)                            | 941 (8.8)                             | 17,285 (55.7)                                | 161 (9.9)                            |
| Poor (≥30)                            | 358 (3.2)                             | 7,661 (21.2)                                 | 1,704 (83.3)                         | 970 (2.9)                             | 20,111 (19.6)                                | 4,547 (81.1)                         | 286 (2.7)                             | 5,697 (18.4)                                 | 1,312 (80.7)                         |
| Physical activity                     |                                       |                                              |                                      |                                       |                                              |                                      |                                       |                                              |                                      |
| Ideal (regular physical activity)     | 10,960 (96.8)                         | 23,004 (63.6)                                | 443 (21.7)                           | 32,643 (97.2)                         | 65,591 (64.0)                                | 1,298 (23.1)                         | 10,384 (97.4)                         | 19,959 (64.3)                                | 346 (21.3)                           |
| Intermediate (some physical activity) | 313 (2.8)                             | 11,434 (31.6)                                | 280 (13.7)                           | 797 (2.4)                             | 32,121 (31.3)                                | 754 (13.4)                           | 240 (2.3)                             | 9,701 (31.2)                                 | 229 (14.1)                           |
| Poor (no regular physical activity)   | 50 (0.4)                              | 1,755 (4.8)                                  | 1,323 (64.7)                         | 143 (0.4)                             | 4,851 (4.7)                                  | 3,555 (63.4)                         | 42 (0.4)                              | 1,385 (4.5)                                  | 1,050 (64.6)                         |
| Diet                                  |                                       |                                              |                                      |                                       |                                              |                                      |                                       |                                              |                                      |
| Ideal                                 | 4,267 (37.7)                          | 2,535 (7.0)                                  | 11 (0.5)                             | 12,514 (37.3)                         | 7,025 (6.8)                                  | 34 (0.6)                             | 3,835 (36.0)                          | 2,076 (6.7)                                  | 11 (0.7)                             |

|                    | Low Genetic Risk   |                        |                    | Intermediate Genetic Risk |                        |                    | High Genetic risk  |                        |                    |
|--------------------|--------------------|------------------------|--------------------|---------------------------|------------------------|--------------------|--------------------|------------------------|--------------------|
|                    | Ideal lifestyle    | Intermediate lifestyle | Poor lifestyle     | Ideal lifestyle           | Intermediate lifestyle | Poor lifestyle     | Ideal lifestyle    | Intermediate lifestyle | Poor lifestyle     |
| Characteristics    | Mean±SD or No. (%) | Mean±SD or No. (%)     | Mean±SD or No. (%) | Mean±SD or No. (%)        | Mean±SD or No. (%)     | Mean±SD or No. (%) | Mean±SD or No. (%) | Mean±SD or No. (%)     | Mean±SD or No. (%) |
| Poor               | 7,056 (62.3)       | 33,658 (93.0)          | 2,035 (99.5)       | 21,069 (62.7)             | 95,538 (93.2)          | 5,573 (99.4)       | 6,831 (64.0)       | 28,969 (93.3)          | 1,614 (99.3)       |
| Years in education | 16.10±4.49         | 14.94±4.72             | 12.86±4.63         | 16.09±4.46                | 14.94±4.68             | 12.70±4.62         | 16.16±4.44         | 14.98±4.67             | 12.64±4.72         |
| Income, £          |                    |                        |                    |                           |                        |                    |                    |                        |                    |
| <18,000            | 1,573 (13.9)       | 6,009 (16.6)           | 576 (28.2)         | 4,460 (13.3)              | 16,645 (16.2)          | 1,571 (28.0)       | 1,387 (13.0)       | 4,993 (16.1)           | 452 (27.8)         |
| 18,000 – 30,999    | 2,314 (20.4)       | 7,884 (21.8)           | 426 (20.8)         | 6,894 (20.5)              | 22,262 (21.7)          | 1,204 (21.5)       | 2,175 (20.4)       | 6,649 (21.4)           | 348 (21.4)         |
| 31,000 – 51,999    | 2,711 (23.9)       | 8,689 (24.0)           | 371 (18.1)         | 8,295 (24.7)              | 24,991 (24.4)          | 1,076 (19.2)       | 2,602 (24.4)       | 7,636 (24.6)           | 296 (18.2)         |
| 52,000 – 100,000   | 2,559 (22.6)       | 7,120 (19.7)           | 258 (12.6)         | 7,416 (22.1)              | 20,599 (20.1)          | 632 (11.3)         | 2,421 (22.7)       | 6,356 (20.5)           | 189 (11.6)         |
| >100,000           | 775 (6.8)          | 1,905 (5.3)            | 46 (2.2)           | 2,272 (6.8)               | 5,163 (5.0)            | 118 (2.1)          | 767 (7.2)          | 1,611 (5.2)            | 37 (2.3)           |
| Unknown            | 1,391 (12.3)       | 4,586 (12.7)           | 369 (18.0)         | 4,246 (12.6)              | 12,903 (12.6)          | 1,006 (17.9)       | 1,314 (12.3)       | 3,800 (12.2)           | 303 (18.6)         |

Lifestyle was defined as ideal if 3 or more ideal lifestyle factors were present, poor if 3 or more poor lifestyle factors were present, or as intermediate (all other combinations. Ideal diet was defined as adequate intake of at least 5 dietary components. Poor diet was defined as inadequate intake of at least 5 dietary components.

**eTable 12.** Baseline characteristics per lifestyle category and genetic risk group of type 2 diabetes

| Characteristics                       | Low Genetic Risk                      |                                              |                                      | Intermediate Genetic Risk             |                                              |                                      | High Genetic risk                     |                                              |                                      |
|---------------------------------------|---------------------------------------|----------------------------------------------|--------------------------------------|---------------------------------------|----------------------------------------------|--------------------------------------|---------------------------------------|----------------------------------------------|--------------------------------------|
|                                       | Ideal lifestyle<br>Mean±SD or No. (%) | Intermediate lifestyle<br>Mean±SD or No. (%) | Poor lifestyle<br>Mean±SD or No. (%) | Ideal lifestyle<br>Mean±SD or No. (%) | Intermediate lifestyle<br>Mean±SD or No. (%) | Poor lifestyle<br>Mean±SD or No. (%) | Ideal lifestyle<br>Mean±SD or No. (%) | Intermediate lifestyle<br>Mean±SD or No. (%) | Poor lifestyle<br>Mean±SD or No. (%) |
| N total                               | 14,074                                | 50,521                                       | 3,439                                | 40,339                                | 144,261                                      | 9,339                                | 12,609                                | 44,670                                       | 2,762                                |
| Age, y                                | 56.13±8.15                            | 56.98±7.95                                   | 56.16±7.89                           | 56.09±8.13                            | 56.91±7.97                                   | 56.32±7.80                           | 56.10±8.09                            | 56.77±8.00                                   | 55.84±7.87                           |
| Female                                | 9,039 (64.2)                          | 25,681 (50.8)                                | 1,917 (55.7)                         | 26,127 (64.8)                         | 74,391 (51.6)                                | 5,080 (54.4)                         | 8,218 (65.2)                          | 23,165 (51.9)                                | 1,512 (54.7)                         |
| Systolic blood pressure, mm Hg        | 129.5±17.9                            | 134.5±17.9                                   | 134.9±17.5                           | 129.4±17.9                            | 134.6±17.8                                   | 135.7±17.7                           | 129.5±17.8                            | 134.7±17.9                                   | 135.2±17.7                           |
| Diastolic blood pressure, mm Hg       | 79.6±8.3                              | 82.8±8.5                                     | 84.3±8.4                             | 79.6±8.2                              | 82.8±8.4                                     | 84.5±8.6                             | 79.6±8.2                              | 82.8±8.5                                     | 84.5±8.6                             |
| Smoking                               |                                       |                                              |                                      |                                       |                                              |                                      |                                       |                                              |                                      |
| Ideal (never or stopped >1 year ago)  | 12,855 (91.3)                         | 23,686 (46.9)                                | 887 (25.8)                           | 36,895 (91.5)                         | 68,493 (47.5)                                | 2,303 (24.7)                         | 11,524 (91.4)                         | 21,116 (47.3)                                | 680 (24.6)                           |
| Intermediate (stopped <1 year ago)    | 1,007 (7.2)                           | 22,180 (43.9)                                | 665 (19.3)                           | 2,882 (7.1)                           | 62,206 (43.1)                                | 1,817 (19.5)                         | 898 (7.1)                             | 19,403 (43.4)                                | 519 (18.8)                           |
| Poor (current smoker)                 | 212 (1.5)                             | 4,655 (9.2)                                  | 1,887 (54.9)                         | 562 (1.4)                             | 13,562 (9.4)                                 | 5,219 (55.9)                         | 187 (1.5)                             | 4,151 (9.3)                                  | 1,563 (56.6)                         |
| Body Mass Index, kg/m <sup>2</sup>    | 23.70±2.91                            | 27.95±4.31                                   | 33.12±5.24                           | 23.71±2.93                            | 27.86±4.22                                   | 32.80±5.21                           | 23.68±2.84                            | 27.72±4.05                                   | 32.49±4.85                           |
| Ideal (18.5 – 24.9)                   | 12,024 (85.4)                         | 10,651 (21.1)                                | 221 (6.4)                            | 34,332 (85.1)                         | 30,796 (21.3)                                | 677 (7.2)                            | 10,781 (85.5)                         | 9,660 (21.6)                                 | 198 (7.2)                            |
| Intermediate (25 - 29.9)              | 1,497 (10.6)                          | 27,407 (54.2)                                | 273 (7.9)                            | 4,358 (10.8)                          | 79,082 (54.8)                                | 840 (9.0)                            | 1,336 (10.6)                          | 24,935 (55.8)                                | 261 (9.4)                            |
| Poor (≥30)                            | 553 (3.9)                             | 12,463 (24.7)                                | 2,945 (85.6)                         | 1,649 (4.1)                           | 34,383 (23.8)                                | 7,822 (83.8)                         | 492 (3.9)                             | 10,075 (22.6)                                | 2,303 (83.4)                         |
| Physical activity                     |                                       |                                              |                                      |                                       |                                              |                                      |                                       |                                              |                                      |
| Ideal (regular physical activity)     | 13,673 (97.2)                         | 32,055 (63.4)                                | 705 (20.5)                           | 39,157 (97.1)                         | 91,488 (63.4)                                | 1,851 (19.8)                         | 12,259 (97.2)                         | 28,325 (63.4)                                | 565 (20.5)                           |
| Intermediate (some physical activity) | 330 (2.3)                             | 15,965 (31.6)                                | 431 (12.5)                           | 1,015 (2.5)                           | 45,652 (31.6)                                | 1,177 (12.6)                         | 296 (2.3)                             | 14,047 (31.4)                                | 352 (12.7)                           |
| Poor (no regular physical activity)   | 71 (0.5)                              | 2,501 (5.0)                                  | 2,303 (67.0)                         | 167 (0.4)                             | 7,121 (4.9)                                  | 6,311 (67.6)                         | 54 (0.4)                              | 2,298 (5.1)                                  | 1,845 (66.8)                         |
| Diet                                  |                                       |                                              |                                      |                                       |                                              |                                      |                                       |                                              |                                      |
| Ideal                                 | 5,487 (39.0)                          | 3,695 (7.3)                                  | 13 (0.4)                             | 15,792 (39.1)                         | 10,695 (7.4)                                 | 63 (0.7)                             | 4,908 (38.9)                          | 3,280 (7.3)                                  | 15 (0.5)                             |

|                    | Low Genetic Risk   |                        |                    | Intermediate Genetic Risk |                        |                    | High Genetic risk  |                        |                    |
|--------------------|--------------------|------------------------|--------------------|---------------------------|------------------------|--------------------|--------------------|------------------------|--------------------|
|                    | Ideal lifestyle    | Intermediate lifestyle | Poor lifestyle     | Ideal lifestyle           | Intermediate lifestyle | Poor lifestyle     | Ideal lifestyle    | Intermediate lifestyle | Poor lifestyle     |
| Characteristics    | Mean±SD or No. (%) | Mean±SD or No. (%)     | Mean±SD or No. (%) | Mean±SD or No. (%)        | Mean±SD or No. (%)     | Mean±SD or No. (%) | Mean±SD or No. (%) | Mean±SD or No. (%)     | Mean±SD or No. (%) |
| Poor               | 8,587 (61.0)       | 46,826 (92.7)          | 3,426 (99.6)       | 24,547 (60.9)             | 133,566 (92.6)         | 9,276 (99.3)       | 7,701 (61.1)       | 41,390 (92.7)          | 2,747 (99.5)       |
| Years in education | 15.93±4.58         | 14.65±4.79             | 12.56±4.71         | 15.94±4.55                | 14.66±4.78             | 12.37±4.67         | 15.90±4.57         | 14.64±4.77             | 12.36±4.68         |
| Income, £          |                    |                        |                    |                           |                        |                    |                    |                        |                    |
| <18,000            | 2,063 (14.7)       | 93,66 (18.5)           | 1,064 (30.9)       | 5,889 (14.6)              | 26,562 (18.4)          | 2,857 (30.6)       | 1,779 (14.1)       | 8,212 (18.4)           | 841 (30.4)         |
| 18,000 – 30,999    | 2,976 (21.1)       | 11,326 (22.4)          | 714 (20.8)         | 8,638 (21.4)              | 32,333 (22.4)          | 1,982 (21.2)       | 2,628 (20.8)       | 10,167 (22.8)          | 552 (20.0)         |
| 31,000 – 51,999    | 3,389 (24.1)       | 11,796 (23.3)          | 633 (18.4)         | 9,609 (23.8)              | 33,679 (23.3)          | 1,562 (16.7)       | 3,036 (24.1)       | 10,440 (23.4)          | 513 (18.6)         |
| 52,000 – 100,000   | 2,934 (20.8)       | 8,962 (17.7)           | 349 (10.1)         | 8,432 (20.9)              | 26,289 (18.2)          | 956 (10.2)         | 2,691 (21.3)       | 7,989 (17.9)           | 267 (9.7)          |
| >100,000           | 878 (6.2)          | 2,317 (4.6)            | 68 (2.0)           | 2,582 (6.4)               | 6,501 (4.5)            | 172 (1.8)          | 798 (6.3)          | 2,021 (4.5)            | 55 (2.0)           |
| Unknown            | 1,834 (13.0)       | 6,754 (13.4)           | 611 (17.8)         | 5,189 (12.9)              | 18,897 (13.1)          | 1,810 (19.4)       | 1,677 (13.3)       | 5,841 (13.1)           | 534 (19.3)         |

Lifestyle was defined as ideal if 3 or more ideal lifestyle factors were present, poor if 3 or more poor lifestyle factors were present, or as intermediate (all other combinations. Ideal diet was defined as adequate intake of at least 5 dietary components. Poor diet was defined as inadequate intake of at least 5 dietary components.

**eTable 13.** Genetic risk of cardiovascular diseases and diabetes

| Outcome                 | Genetic risk | Total No. | No. events (%) | Person-time at risk (years) | AR   | HR (95% CI)      | P value               |
|-------------------------|--------------|-----------|----------------|-----------------------------|------|------------------|-----------------------|
| Coronary Artery Disease | Low          | 65,991    | 1,502 (2.28)   | 400,014                     | 2.28 | 1                | Reference             |
|                         | Intermediate | 195,709   | 5,733 (2.93)   | 1,184,293                   | 2.93 | 1.31 (1.24-1.38) | <1.0x10 <sup>-6</sup> |
|                         | High         | 63,433    | 2,536 (4.00)   | 381,934                     | 4.00 | 1.86 (1.74-1.98) | <1.0x10 <sup>-6</sup> |
| Atrial Fibrillation     | Low          | 65,804    | 962 (1.44)     | 406,973                     | 1.44 | 1                | Reference             |
|                         | Intermediate | 198,312   | 4,037 (2.00)   | 1,231,234                   | 2.00 | 1.40 (1.31-1.50) | <1.0x10 <sup>-6</sup> |
|                         | High         | 62,426    | 2,096 (3.25)   | 390,063                     | 3.25 | 2.33 (2.16-2.52) | <1.0x10 <sup>-6</sup> |
| Stroke                  | Low          | 74,838    | 641 (0.86)     | 457,230                     | 0.86 | 1                | Reference             |
|                         | Intermediate | 191,680   | 1,804 (0.94)   | 1,171,263                   | 0.94 | 1.10 (1.01-1.21) | 3.3x10 <sup>-2</sup>  |
|                         | High         | 66,453    | 700 (1.05)     | 406,128                     | 1.05 | 1.24 (1.12-1.38) | 6.9x10 <sup>-5</sup>  |
| Hypertension            | Low          | 49,562    | 2,012 (4.06)   | 298,699                     | 4.06 | 1                | Reference             |
|                         | Intermediate | 141,753   | 6,972 (4.92)   | 850,690                     | 4.92 | 1.24 (1.18-1.31) | <1.0x10 <sup>-6</sup> |
|                         | High         | 43,336    | 2,374 (5.48)   | 259,282                     | 5.48 | 1.44 (1.36-1.53) | <1.0x10 <sup>-6</sup> |
| Diabetes Mellitus       | Low          | 68,034    | 677 (1.00)     | 416,049                     | 1.00 | 1                | Reference             |
|                         | Intermediate | 193,939   | 2,597 (1.34)   | 1,183,801                   | 1.34 | 1.36 (1.25-1.48) | <1.0x10 <sup>-6</sup> |
|                         | High         | 60,041    | 1,105 (1.84)   | 365,707                     | 1.84 | 1.91 (1.74-2.10) | <1.0x10 <sup>-6</sup> |

Shown are absolute risks (AR) and hazard ratios (HR) with 95% Confidence Intervals of new-onset events during 6.2 year follow-up associated with intermediate or high genetic risk of the specific endpoint. Genetic risk scores were calculated and divided into quintiles. Individuals in the lowest quintile were considered at low genetic risk, individuals in quintiles 2-4 at intermediate risk, and those in the highest quintile at high risk. Person-times at risk are provided in years per genetic risk group of each outcome. The genetic risk score of coronary artery disease included 169 single nucleotide polymorphisms (SNPs), atrial fibrillation 25 SNPs, stroke 11 SNPs, hypertension 107 SNPs, and diabetes mellitus 38 SNPs.



**eTable 14.** Associations of individual lifestyle factors with cardiovascular diseases and diabetes across genetic risk groups

| Lifestyle Factor | Genetic risk | Lifestyle Factor category | Coronary Artery Disease |                       | Atrial Fibrillation |                       | Stroke             |                       | Hypertension       |                       | Diabetes Mellitus Type 2 |                       |
|------------------|--------------|---------------------------|-------------------------|-----------------------|---------------------|-----------------------|--------------------|-----------------------|--------------------|-----------------------|--------------------------|-----------------------|
|                  |              |                           | HR (95% CI)             | P value               | HR (95% CI)         | P value               | HR (95% CI)        | P value               | HR (95% CI)        | P value               | HR (95% CI)              | P value               |
| Smoking          | Low          | Ideal                     | 1                       | Reference             | 1                   | Reference             | 1                  | Reference             | 1                  | Reference             | 1                        | Reference             |
|                  |              | Intermediate              | 1.22 (1.09 - 1.37)      | 3.8x10 <sup>-4</sup>  | 1.14 (0.99 - 1.30)  | 6.4x10 <sup>-2</sup>  | 1.06 (0.89 - 1.26) | 4.9x10 <sup>-1</sup>  | 1.32 (1.20 - 1.45) | <1.0x10 <sup>-6</sup> | 1.31 (1.11 - 1.54)       | 1.3x10 <sup>-3</sup>  |
|                  |              | Poor                      | 1.83 (1.58 - 2.12)      | <1.0x10 <sup>-6</sup> | 1.30 (1.05 - 1.60)  | 1.7x10 <sup>-2</sup>  | 2.11 (1.70 - 2.62) | <1.0x10 <sup>-6</sup> | 1.55 (1.35 - 1.77) | <1.0x10 <sup>-6</sup> | 1.49 (1.18 - 1.87)       | 8.2x10 <sup>-4</sup>  |
|                  | Intermediate | Ideal                     | 1.29 (1.18 - 1.41)      | <1.0x10 <sup>-6</sup> | 1.38 (1.24 - 1.53)  | <1.0x10 <sup>-6</sup> | 1.11 (0.97 - 1.28) | 1.2x10 <sup>-1</sup>  | 1.31 (1.22 - 1.41) | <1.0x10 <sup>-6</sup> | 1.34 (1.18 - 1.53)       | 9.6x10 <sup>-6</sup>  |
|                  |              | Intermediate              | 1.63 (1.49 - 1.78)      | <1.0x10 <sup>-6</sup> | 1.64 (1.47 - 1.82)  | <1.0x10 <sup>-6</sup> | 1.22 (1.06 - 1.40) | 4.9x10 <sup>-3</sup>  | 1.55 (1.44 - 1.67) | <1.0x10 <sup>-6</sup> | 1.75 (1.54 - 2.00)       | <1.0x10 <sup>-6</sup> |
|                  |              | Poor                      | 2.35 (2.12 - 2.61)      | <1.0x10 <sup>-6</sup> | 1.72 (1.50 - 1.96)  | <1.0x10 <sup>-6</sup> | 2.08 (1.76 - 2.45) | <1.0x10 <sup>-6</sup> | 1.81 (1.65 - 1.98) | <1.0x10 <sup>-6</sup> | 2.19 (1.88 - 2.56)       | <1.0x10 <sup>-6</sup> |
|                  | High         | Ideal                     | 1.90 (1.72 - 2.09)      | <1.0x10 <sup>-6</sup> | 2.30 (2.05 - 2.58)  | <1.0x10 <sup>-6</sup> | 1.29 (1.10 - 1.52) | 1.6x10 <sup>-3</sup>  | 1.53 (1.40 - 1.66) | <1.0x10 <sup>-6</sup> | 1.86 (1.60 - 2.15)       | <1.0x10 <sup>-6</sup> |
|                  |              | Intermediate              | 2.21 (2.00 - 2.44)      | <1.0x10 <sup>-6</sup> | 2.75 (2.45 - 3.08)  | <1.0x10 <sup>-6</sup> | 1.39 (1.18 - 1.64) | 9.7x10 <sup>-5</sup>  | 1.80 (1.64 - 1.97) | <1.0x10 <sup>-6</sup> | 2.54 (2.19 - 2.94)       | <1.0x10 <sup>-6</sup> |
|                  |              | Poor                      | 3.39 (2.99 - 3.84)      | <1.0x10 <sup>-6</sup> | 2.69 (2.28 - 3.17)  | <1.0x10 <sup>-6</sup> | 2.06 (1.64 - 2.60) | <1.0x10 <sup>-6</sup> | 1.95 (1.71 - 2.22) | <1.0x10 <sup>-6</sup> | 2.72 (2.23 - 3.32)       | <1.0x10 <sup>-6</sup> |
|                  |              |                           |                         |                       |                     |                       |                    |                       |                    |                       |                          |                       |
| BMI              | Low          | Ideal                     | 1                       | Reference             | 1                   | Reference             | 1                  | Reference             | 1                  | Reference             | 1                        | Reference             |
|                  |              | Intermediate              | 1.20 (1.05 - 1.37)      | 6.8x10 <sup>-3</sup>  | 1.14 (0.96 - 1.34)  | 1.3x10 <sup>-1</sup>  | 1.15 (0.95 - 1.39) | 1.6x10 <sup>-1</sup>  | 1.47 (1.31 - 1.64) | <1.0x10 <sup>-6</sup> | 2.19 (1.64 - 2.93)       | <1.0x10 <sup>-6</sup> |
|                  |              | Poor                      | 1.82 (1.59 - 2.09)      | <1.0x10 <sup>-6</sup> | 1.84 (1.55 - 2.18)  | <1.0x10 <sup>-6</sup> | 1.21 (0.97 - 1.49) | 8.7x10 <sup>-2</sup>  | 2.58 (2.29 - 2.91) | <1.0x10 <sup>-6</sup> | 8.45 (6.43 - 11.10)      | <1.0x10 <sup>-6</sup> |
|                  | Intermediate | Ideal                     | 1.24 (1.09 - 1.40)      | 6.6x10 <sup>-4</sup>  | 1.41 (1.21 - 1.64)  | 7.1x10 <sup>-5</sup>  | 1.19 (1.00 - 1.42) | 5.5x10 <sup>-2</sup>  | 1.26 (1.14 - 1.40) | 1.2x10 <sup>-5</sup>  | 1.34 (1.00 - 1.78)       | 4.7x10 <sup>-2</sup>  |
|                  |              | Intermediate              | 1.64 (1.46 - 1.84)      | <1.0x10 <sup>-6</sup> | 1.60 (1.38 - 1.85)  | <1.0x10 <sup>-6</sup> | 1.13 (0.96 - 1.34) | 1.5x10 <sup>-1</sup>  | 1.87 (1.69 - 2.06) | <1.0x10 <sup>-6</sup> | 3.39 (2.60 - 4.42)       | <1.0x10 <sup>-6</sup> |
|                  |              | Poor                      | 2.34 (2.08 - 2.63)      | <1.0x10 <sup>-6</sup> | 2.56 (2.21 - 2.96)  | <1.0x10 <sup>-6</sup> | 1.47 (1.24 - 1.75) | 1.6x10 <sup>-5</sup>  | 3.22 (2.91 - 3.57) | <1.0x10 <sup>-6</sup> | 11.12 (8.57 - 14.43)     | <1.0x10 <sup>-6</sup> |
|                  | High         | Ideal                     | 1.83 (1.60 - 2.09)      | <1.0x10 <sup>-6</sup> | 2.27 (1.93 - 2.61)  | <1.0x10 <sup>-6</sup> | 1.27 (1.03 - 1.52) | 2.8x10 <sup>-2</sup>  | 1.36 (1.20 - 1.52) | 1.3x10 <sup>-5</sup>  | 1.95 (1.41 - 2.60)       | 4.6x10 <sup>-5</sup>  |

| Lifestyle Factor  | Genetic risk | Lifestyle Factor category | Coronary Artery Disease |                       | Atrial Fibrillation |                       | Stroke             |                       | Hypertension       |                       | Diabetes Mellitus Type 2 |                       |
|-------------------|--------------|---------------------------|-------------------------|-----------------------|---------------------|-----------------------|--------------------|-----------------------|--------------------|-----------------------|--------------------------|-----------------------|
|                   |              |                           | HR (95% CI)             | P value               | HR (95% CI)         | P value               | HR (95% CI)        | P value               | HR (95% CI)        | P value               | HR (95% CI)              | P value               |
|                   |              |                           | - 2.10)                 |                       | - 2.67)             |                       | - 1.56)            |                       | - 1.54)            |                       | - 2.68)                  |                       |
|                   |              | Intermediate              | 2.40 (2.12 - 2.71)      | <1.0x10 <sup>-6</sup> | 2.67 (2.30 - 3.11)  | <1.0x10 <sup>-6</sup> | 1.36 (1.13 - 1.65) | 1.4x10 <sup>-3</sup>  | 2.23 (2.00 - 2.49) | <1.0x10 <sup>-6</sup> | 5.11 (3.89 - 6.71)       | <1.0x10 <sup>-6</sup> |
|                   |              | Poor                      | 3.07 (2.70 - 3.49)      | <1.0x10 <sup>-6</sup> | 4.37 (3.75 - 5.10)  | <1.0x10 <sup>-6</sup> | 1.59 (1.29 - 1.95) | 1.3x10 <sup>-5</sup>  | 3.86 (3.43 - 4.35) | <1.0x10 <sup>-6</sup> | 15.43 (11.80 - 20.17)    | <1.0x10 <sup>-6</sup> |
|                   |              |                           |                         |                       |                     |                       |                    |                       |                    |                       |                          |                       |
| Physical Activity | Low          | Ideal                     | 1                       | Reference             | 1                   | Reference             | 1                  | Reference             | 1                  | Reference             | 1                        | Reference             |
|                   |              | Intermediate              | 1.22 (1.09 - 1.38)      | 8.4x10 <sup>-4</sup>  | 1.10 (0.95 - 1.28)  | 2.0x10 <sup>-1</sup>  | 1.19 (1.00 - 1.43) | 5.4x10 <sup>-2</sup>  | 1.18 (1.06 - 1.31) | 1.8x10 <sup>-3</sup>  | 1.48 (1.24 - 1.76)       | 1.3x10 <sup>-5</sup>  |
|                   |              | Poor                      | 1.78 (1.52 - 2.08)      | <1.0x10 <sup>-6</sup> | 1.58 (1.29 - 1.94)  | 9.5x10 <sup>-6</sup>  | 1.57 (1.23 - 2.01) | 3.5x10 <sup>-4</sup>  | 1.74 (1.50 - 2.01) | <1.0x10 <sup>-6</sup> | 2.85 (2.32 - 3.49)       | <1.0x10 <sup>-6</sup> |
|                   | Intermediate | Ideal                     | 1.33 (1.24 - 1.43)      | <1.0x10 <sup>-6</sup> | 1.39 (1.27 - 1.52)  | <1.0x10 <sup>-6</sup> | 1.12 (1.00 - 1.25) | 5.4x10 <sup>-2</sup>  | 1.24 (1.17 - 1.32) | <1.0x10 <sup>-6</sup> | 1.36 (1.21 - 1.52)       | <1.0x10 <sup>-6</sup> |
|                   |              | Intermediate              | 1.53 (1.41 - 1.66)      | <1.0x10 <sup>-6</sup> | 1.63 (1.47 - 1.80)  | <1.0x10 <sup>-6</sup> | 1.26 (1.11 - 1.45) | 6.4x10 <sup>-4</sup>  | 1.50 (1.40 - 1.62) | <1.0x10 <sup>-6</sup> | 2.25 (1.99 - 2.55)       | <1.0x10 <sup>-6</sup> |
|                   |              | Poor                      | 2.31 (2.10 - 2.55)      | <1.0x10 <sup>-6</sup> | 2.06 (1.82 - 2.33)  | <1.0x10 <sup>-6</sup> | 1.75 (1.48 - 2.08) | <1.0x10 <sup>-6</sup> | 2.00 (1.82 - 2.20) | <1.0x10 <sup>-6</sup> | 3.23 (2.80 - 3.73)       | <1.0x10 <sup>-6</sup> |
|                   | High         | Ideal                     | 1.82 (1.68 - 1.98)      | <1.0x10 <sup>-6</sup> | 2.30 (2.09 - 2.53)  | <1.0x10 <sup>-6</sup> | 1.25 (1.09 - 1.44) | 1.2x10 <sup>-3</sup>  | 1.45 (1.35 - 1.56) | <1.0x10 <sup>-6</sup> | 1.98 (1.74 - 2.25)       | <1.0x10 <sup>-6</sup> |
|                   |              | Intermediate              | 2.44 (2.21 - 2.69)      | <1.0x10 <sup>-6</sup> | 2.73 (2.44 - 3.07)  | <1.0x10 <sup>-6</sup> | 1.47 (1.24 - 1.75) | 1.4x10 <sup>-5</sup>  | 1.72 (1.56 - 1.90) | <1.0x10 <sup>-6</sup> | 2.99 (2.58 - 3.48)       | <1.0x10 <sup>-6</sup> |
|                   |              | Poor                      | 3.05 (2.67 - 3.48)      | <1.0x10 <sup>-6</sup> | 3.39 (2.90 - 3.95)  | <1.0x10 <sup>-6</sup> | 1.90 (1.49 - 2.42) | <1.0x10 <sup>-6</sup> | 2.15 (1.86 - 2.49) | <1.0x10 <sup>-6</sup> | 4.14 (3.43 - 5.00)       | <1.0x10 <sup>-6</sup> |
|                   |              |                           |                         |                       |                     |                       |                    |                       |                    |                       |                          |                       |
| Diet              | Low          | Ideal                     | 1                       | Reference             | 1                   | Reference             | 1                  | Reference             | 1                  | Reference             | 1                        | Reference             |
|                   |              | Poor                      | 1.02 (0.88 - 1.18)      | 8.3x10 <sup>-1</sup>  | 0.94 (0.79 - 1.12)  | 4.9x10 <sup>-1</sup>  | 1.11 (0.89 - 1.40) | 3.6x10 <sup>-1</sup>  | 1.16 (1.02 - 1.32) | 2.7x10 <sup>-2</sup>  | 1.23 (0.97 - 1.56)       | 8.8x10 <sup>-2</sup>  |
|                   | Intermediate | Ideal                     | 1.30 (1.12 - 1.52)      | 7.4x10 <sup>-4</sup>  | 1.38 (1.15 - 1.65)  | 4.7x10 <sup>-4</sup>  | 1.21 (0.95 - 1.55) | 1.2x10 <sup>-1</sup>  | 1.35 (1.17 - 1.55) | 2.4x10 <sup>-5</sup>  | 1.38 (1.07 - 1.78)       | 1.2x10 <sup>-2</sup>  |
|                   |              | Poor                      | 1.33 (1.16 - 1.53)      | 6.7x10 <sup>-5</sup>  | 1.32 (1.12 - 1.56)  | 8.2x10 <sup>-4</sup>  | 1.21 (0.97 - 1.50) | 8.7x10 <sup>-2</sup>  | 1.42 (1.25 - 1.61) | <1.0x10 <sup>-6</sup> | 1.67 (1.33 - 2.10)       | 1.1x10 <sup>-5</sup>  |

| Lifestyle Factor | Genetic risk | Lifestyle Factor category | Coronary Artery Disease |                       | Atrial Fibrillation |                       | Stroke             |                      | Hypertension       |                       | Diabetes Mellitus Type 2 |                       |
|------------------|--------------|---------------------------|-------------------------|-----------------------|---------------------|-----------------------|--------------------|----------------------|--------------------|-----------------------|--------------------------|-----------------------|
|                  |              |                           | HR (95% CI)             | P value               | HR (95% CI)         | P value               | HR (95% CI)        | P value              | HR (95% CI)        | P value               | HR (95% CI)              | P value               |
|                  | High         | Ideal                     | 1.81 (1.52 - 2.15)      | <1.0x10 <sup>-6</sup> | 2.49 (2.05 - 3.02)  | <1.0x10 <sup>-6</sup> | 1.54 (1.17 - 2.04) | 2.3x10 <sup>-3</sup> | 1.53 (1.30 - 1.80) | <1.0x10 <sup>-6</sup> | 1.91 (1.44 - 2.54)       | 8.2x10 <sup>-6</sup>  |
|                  |              | Poor                      | 1.89 (1.64 - 2.18)      | <1.0x10 <sup>-6</sup> | 2.16 (1.83 - 2.56)  | <1.0x10 <sup>-6</sup> | 1.33 (1.06 - 1.67) | 1.4x10 <sup>-2</sup> | 1.64 (1.44 - 1.87) | <1.0x10 <sup>-6</sup> | 2.32 (1.84 - 2.93)       | <1.0x10 <sup>-6</sup> |

Shown are hazard ratios (HR) with 95% Confidence Intervals of new-onset events during 6.2 year follow-up associated with individual lifestyle factor categories in low, intermediate and high genetic risk groups. Individuals in the lowest quintile were considered at low genetic risk, individuals in quintiles 2-4 at intermediate risk, and those in the highest quintile at high risk. The genetic risk score of coronary artery disease included 169 single nucleotide polymorphisms (SNPs), atrial fibrillation 25 SNPs, stroke 11 SNPs, hypertension 107 SNPs, and diabetes mellitus 38 SNPs

**eTable 15.** Genetic and lifestyle risk of hypertension in individuals with baseline systolic blood pressure less than 130 mm Hg and/or diastolic blood pressure less than 80 mm Hg

| Outcome      | Genetic risk | Lifestyle    | Total No. | No. events (%) | Incidence rate | Person-time at risk (years) |
|--------------|--------------|--------------|-----------|----------------|----------------|-----------------------------|
| Hypertension | Low          | Ideal        | 6,244     | 56 (0.9)       | 1.47           | 38,063                      |
|              |              | Intermediate | 14,134    | 227 (1.6)      | 2.64           | 85,929                      |
|              |              | Poor         | 641       | 32 (4.8)       | 8.34           | 3,839                       |
|              | Intermediate | Ideal        | 16,153    | 133 (0.8)      | 1.35           | 98,431                      |
|              |              | Intermediate | 34,962    | 560 (1.6)      | 2.64           | 212,228                     |
|              |              | Poor         | 1,522     | 72 (4.5)       | 7.84           | 9,179                       |
|              | High         | Ideal        | 4,508     | 35 (0.8)       | 1.28           | 27,408                      |
|              |              | Intermediate | 9,068     | 125 (1.4)      | 2.26           | 55,204                      |
|              |              | Poor         | 382       | 15 (3.8)       | 6.42           | 2,335                       |

Shown are the total number of participants and new-onset hypertension events per group during 6.2 year follow-up. The incidence rate is provided per 1000 person-years. Individuals with baseline systolic blood pressure (SBP)  $\geq$ 130 mm Hg or diastolic blood pressure (DBP)  $\geq$ 80 mm Hg were excluded from the analyses. The genetic risk score of hypertension included 107 single nucleotide polymorphisms.

**eTable 16.** Genetic and lifestyle risk of cardiovascular diseases and diabetes in equally sized tertiles of genetic risk

| Outcome                 | Genetic risk | Lifestyle    | Total No. | No. events (%) | Incidence rate | Person-time at risk (years) | AR   | HR (95% CI)      | P value               |
|-------------------------|--------------|--------------|-----------|----------------|----------------|-----------------------------|------|------------------|-----------------------|
| Coronary Artery Disease | Low          | Ideal        | 22,705    | 305 (1.3)      | 2.21           | 138,093                     | 1.34 | 1                | Reference             |
|                         |              | Intermediate | 81,630    | 2,035 (2.5)    | 4.12           | 494,507                     | 2.49 | 1.48 (1.31-1.67) | <1.0x10 <sup>-6</sup> |
|                         |              | Poor         | 5,475     | 272 (5.0)      | 8.24           | 33,022                      | 4.97 | 2.83 (2.40-3.33) | <1.0x10 <sup>-6</sup> |
|                         | Intermediate | Ideal        | 22,471    | 367 (1.6)      | 2.68           | 136,703                     | 1.63 | 1.23 (1.06-1.43) | 7.2x10 <sup>-3</sup>  |
|                         |              | Intermediate | 80,826    | 2,480 (3.1)    | 5.07           | 488,879                     | 3.07 | 1.84 (1.63-2.07) | <1.0x10 <sup>-6</sup> |
|                         |              | Poor         | 5,491     | 308 (5.6)      | 9.31           | 33,075                      | 5.61 | 3.30 (2.81-3.87) | <1.0x10 <sup>-6</sup> |
|                         | High         | Ideal        | 22,217    | 454 (2.0)      | 3.37           | 134,754                     | 2.04 | 1.56 (1.35-1.80) | <1.0x10 <sup>-6</sup> |
|                         |              | Intermediate | 78,975    | 3,168 (4.0)    | 6.67           | 475,283                     | 4.01 | 2.49 (2.21-2.80) | <1.0x10 <sup>-6</sup> |
|                         |              | Poor         | 5,343     | 382 (7.1)      | 11.97          | 31,924                      | 7.15 | 4.38 (3.76-5.10) | <1.0x10 <sup>-6</sup> |
| Atrial Fibrillation     | Low          | Ideal        | 22,610    | 214 (0.9)      | 1.55           | 137,840                     | 0.95 | 1                | Reference             |
|                         |              | Intermediate | 83,462    | 1,353 (1.6)    | 2.66           | 508,299                     | 1.62 | 1.40 (1.21-1.61) | 5.9x10 <sup>-6</sup>  |
|                         |              | Poor         | 5,779     | 145 (2.5)      | 4.09           | 35,471                      | 2.51 | 2.25 (1.82-2.78) | <1.0x10 <sup>-6</sup> |
|                         | Intermediate | Ideal        | 23,037    | 301 (1.3)      | 2.14           | 140,539                     | 1.31 | 1.39 (1.16-1.65) | 2.6x10 <sup>-4</sup>  |
|                         |              | Intermediate | 83,907    | 1,728 (2.1)    | 3.39           | 510,309                     | 2.06 | 1.79 (1.56-2.07) | <1.0x10 <sup>-6</sup> |
|                         |              | Poor         | 5,811     | 185 (3.2)      | 5.23           | 35,405                      | 3.18 | 2.88 (2.36-3.52) | <1.0x10 <sup>-6</sup> |
|                         | High         | Ideal        | 22,305    | 451 (2.0)      | 3.33           | 135,349                     | 2.02 | 2.17 (1.84-2.55) | <1.0x10 <sup>-6</sup> |
|                         |              | Intermediate | 80,933    | 2,440 (3.0)    | 4.98           | 490,057                     | 3.01 | 2.66 (2.31-3.06) | <1.0x10 <sup>-6</sup> |
|                         |              | Poor         | 5,793     | 278 (4.8)      | 7.94           | 35,002                      | 4.80 | 4.46 (3.72-5.34) | <1.0x10 <sup>-6</sup> |
| Stroke                  | Low          | Ideal        | 22,835    | 138 (0.6)      | 0.99           | 139,448                     | 0.60 | 1                | Reference             |
|                         |              | Intermediate | 83,823    | 767 (0.9)      | 1.50           | 511,875                     | 0.92 | 1.27 (1.06-1.52) | 1.1x10 <sup>-2</sup>  |
|                         |              | Poor         | 5,717     | 93 (1.6)       | 2.65           | 35,045                      | 1.63 | 2.16 (1.66-2.82) | <1.0x10 <sup>-6</sup> |
|                         | Intermediate | Ideal        | 22,919    | 160 (0.7)      | 1.14           | 140,048                     | 0.70 | 1.16 (0.92-1.46) | 2.0x10 <sup>-1</sup>  |
|                         |              | Intermediate | 83,098    | 801 (1.0)      | 1.58           | 507,660                     | 0.96 | 1.34 (1.12-1.61) | 1.5x10 <sup>-3</sup>  |
|                         |              | Poor         | 5,743     | 100 (1.7)      | 2.83           | 35,344                      | 1.74 | 2.27 (1.75-2.95) | <1.0x10 <sup>-6</sup> |
|                         | High         | Ideal        | 22,234    | 166 (0.7)      | 1.22           | 135,826                     | 0.75 | 1.24 (0.99-1.55) | 6.7x10 <sup>-2</sup>  |
|                         |              | Intermediate | 81,019    | 829 (1.0)      | 1.67           | 495,107                     | 1.02 | 1.43 (1.19-1.71) | 1.1x10 <sup>-4</sup>  |
|                         |              | Poor         | 5,583     | 91 (1.6)       | 2.66           | 34,267                      | 1.63 | 2.16 (1.65-2.82) | <1.0x10 <sup>-6</sup> |
| Hypertension            | Low          | Ideal        | 18,872    | 452 (2.4)      | 3.95           | 114,467                     | 2.40 | 1                | Reference             |
|                         |              | Intermediate | 59,667    | 2,767 (4.6)    | 7.71           | 358,767                     | 4.64 | 1.75 (1.58-1.93) | <1.0x10 <sup>-6</sup> |
|                         |              | Poor         | 3,336     | 290 (8.7)      | 14.65          | 19,789                      | 8.69 | 3.30 (2.84-3.82) | <1.0x10 <sup>-6</sup> |

| Outcome                  | Genetic risk | Lifestyle    | Total No. | No. events (%) | Incidence rate | Person-time at risk (years) | AR    | HR (95% CI)         | P value               |
|--------------------------|--------------|--------------|-----------|----------------|----------------|-----------------------------|-------|---------------------|-----------------------|
|                          |              | Intermediate | 57,054    | 3,038 (5.3)    | 8.89           | 341,734                     | 5.32  | 2.03 (1.84-2.24)    | <1.0x10 <sup>-6</sup> |
|                          |              | Poor         | 3,125     | 304 (9.7)      | 16.45          | 18,486                      | 9.73  | 3.80 (3.28-4.39)    | <1.0x10 <sup>-6</sup> |
|                          | High         | Ideal        | 18,054    | 567 (3.1)      | 5.20           | 108,943                     | 3.14  | 1.36 (1.20-1.54)    | 1.0x10 <sup>-6</sup>  |
|                          |              | Intermediate | 53,080    | 3,120 (5.9)    | 9.84           | 317,074                     | 5.88  | 2.31 (2.09-2.54)    | <1.0x10 <sup>-6</sup> |
|                          |              | Poor         | 2,817     | 299 (10.6)     | 17.99          | 16,619                      | 10.61 | 4.12 (3.55-4.77)    | <1.0x10 <sup>-6</sup> |
| Diabetes Mellitus type 2 | Low          | Ideal        | 23,120    | 72 (0.3)       | 0.51           | 141,526                     | 0.31  | 1                   | Reference             |
|                          |              | Intermediate | 83,492    | 877 (1.1)      | 1.72           | 510,364                     | 1.05  | 2.81 (2.21-3.57)    | <1.0x10 <sup>-6</sup> |
|                          |              | Poor         | 5,563     | 213 (3.8)      | 6.28           | 33,925                      | 3.83  | 9.22 (7.05-12.07)   | <1.0x10 <sup>-6</sup> |
|                          | Intermediate | Ideal        | 22,577    | 80 (0.4)       | 0.58           | 138,087                     | 0.35  | 1.15 (0.84-1.58)    | 3.8x10 <sup>-1</sup>  |
|                          |              | Intermediate | 80,109    | 1,163 (1.5)    | 2.38           | 488,688                     | 1.45  | 3.92 (3.09-4.98)    | <1.0x10 <sup>-6</sup> |
|                          |              | Poor         | 5,212     | 221 (4.2)      | 6.97           | 31,726                      | 4.24  | 9.95 (7.61-13.01)   | <1.0x10 <sup>-6</sup> |
|                          | High         | Ideal        | 21,325    | 94 (0.4)       | 0.72           | 130,400                     | 0.44  | 1.43 (1.06-1.95)    | 2.1x10 <sup>-2</sup>  |
|                          |              | Intermediate | 75,851    | 1,387 (1.8)    | 3.00           | 461,952                     | 1.83  | 4.98 (3.93-6.32)    | <1.0x10 <sup>-6</sup> |
|                          |              | Poor         | 4,765     | 272 (5.7)      | 9.42           | 28,889                      | 5.71  | 13.81 (10.63-17.94) | <1.0x10 <sup>-6</sup> |

Shown are absolute risks (AR) and hazard ratios (HR) with 95% Confidence Intervals of new-onset events during 6.2 year follow-up associated with lifestyle categories in low, intermediate and high genetic risk groups. Genetic risk scores were calculated and divided into tertiles. Individuals in the lowest tertile were considered at low genetic risk, individuals in the middle tertile at intermediate risk, and those in the highest tertile at high risk. Person-times at risk are provided in years per genetic risk group of each outcome. Incidence rates are provided per 1000 person-years. The genetic risk score of coronary artery disease included 169 single nucleotide polymorphisms (SNPs), atrial fibrillation 25 SNPs, stroke 11 SNPs, hypertension 107 SNPs, and diabetes mellitus 38 SNPs.

**eTable 17.** Correlations between individual lifestyle factors and covariates

|                           | <b>Smoking</b> | <b>Body Mass Index</b> | <b>Physical Activity</b> | <b>Diet</b> | <b>Years in education</b> | <b>Income</b> | <b>TDI</b> |
|---------------------------|----------------|------------------------|--------------------------|-------------|---------------------------|---------------|------------|
| <b>Smoking</b>            | 1              |                        |                          |             |                           |               |            |
| <b>Body Mass Index</b>    | 0.065          | 1                      |                          |             |                           |               |            |
| <b>Physical Activity</b>  | 0.064          | 0.217                  | 1                        |             |                           |               |            |
| <b>Diet</b>               | 0.022          | 0.078                  | 0.119                    | 1           |                           |               |            |
| <b>Years in education</b> | -0.147         | -0.149                 | -0.145                   | -0.050      | 1                         |               |            |
| <b>Income</b>             | -0.141         | -0.107                 | -0.131                   | 0.034       | 0.445                     | 1             |            |
| <b>TDI</b>                | 0.171          | 0.076                  | 0.103                    | -0.022      | -0.134                    | -0.238        | 1          |

Correlations between individual lifestyle factors and covariates are presented. Ideal, intermediate and poor smoking, body mass index and activity were coded as 0, 1 and 2 respectively. Ideal and poor diet were coded as 0 and 1 respectively.

Abbreviations: TDI, Townsend Deprivation Index

**eTable 18.** Genetic risk × lifestyle interactions

| <b>Outcome</b>          | <b>GR x Intermediate lifestyle</b> |                | <b>GR x Poor lifestyle</b> |                |
|-------------------------|------------------------------------|----------------|----------------------------|----------------|
|                         | <b>Coefficient</b>                 | <b>P value</b> | <b>Coefficient</b>         | <b>P value</b> |
| Coronary Artery Disease | 1.011                              | 0.83           | 0.930                      | 0.32           |
| Atrial Fibrillation     | 0.886                              | 0.17           | 0.919                      | 0.52           |
| Stroke                  | 1.085                              | 0.86           | 0.879                      | 0.85           |
| Hypertension            | 1.000                              | 0.98           | 0.987                      | 0.44           |
| Diabetes Mellitus       | 1.055                              | 0.75           | 0.815                      | 0.29           |

Interaction between the quantitative genetic risk (GR) and lifestyle for each endpoint. Shown are the interaction effects between GR and intermediate or poor lifestyle compared to ideal lifestyle.



**eTable 19.** Minimal detectable interaction effect between genetic risk × lifestyle

| <b>Outcome</b>          | <b>GR x Intermediate lifestyle</b> | <b>GR x Poor lifestyle</b> |
|-------------------------|------------------------------------|----------------------------|
| Coronary Artery Disease | 1.21                               | 1.50                       |
| Atrial Fibrillation     | 1.25                               | 1.59                       |
| Stroke                  | 1.40                               | 1.95                       |
| Hypertension            | 1.19                               | 1.53                       |
| Diabetes Mellitus       | 1.34                               | 1.84                       |

The minimal detectable interaction effects that would have been detected with 80% power and alpha set at 0.005 in our study population for each outcome.

**eTable 20.** Population-attributable fraction per behavioral lifestyle group

| Outcome                  | Non-ideal to ideal lifestyle |                | Intermediate to ideal lifestyle |                | Poor to ideal lifestyle |                |
|--------------------------|------------------------------|----------------|---------------------------------|----------------|-------------------------|----------------|
|                          | PAF (%) (95% CI)             | <i>P</i> value | PAF (%) (95% CI)                | <i>P</i> value | PAF (%) (95% CI)        | <i>P</i> value |
| Coronary Artery Disease  | 37.3 (33.3 - 41.1)           | <0.001         | 34.3 (30.0 - 38.3)              | <0.001         | 64.5 (60.9 - 67.7)      | <0.001         |
| Atrial Fibrillation      | 24.6 (19.3 - 29.6)           | <0.001         | 21.8 (16.2 - 27.1)              | <0.001         | 53.6 (48.0 - 58.6)      | <0.001         |
| Stroke                   | 18.8 (10.3 - 26.5)           | <0.001         | 15.9 (6.9 - 23.9)               | <0.01          | 50.8 (41.9 - 58.3)      | <0.001         |
| Hypertension             | 43.6 (40.4 - 46.6)           | <0.001         | 41.3 (38.0 - 44.4)              | <0.001         | 70.0 (67.1 - 72.7)      | <0.001         |
| Diabetes Mellitus Type 2 | 72.1 (68.2 - 75.5)           | <0.001         | 68.9 (64.6 - 72.7)              | <0.001         | 89.7 (87.9 - 91.2)      | <0.001         |

Abbreviations: PAF, Population Attributable Fraction; CI, Confidence Interval

**eFigure 1.** Risk of incident hypertension in individuals with baseline systolic blood pressure less than 130 mm Hg and/or diastolic blood pressure less than 80 mm Hg

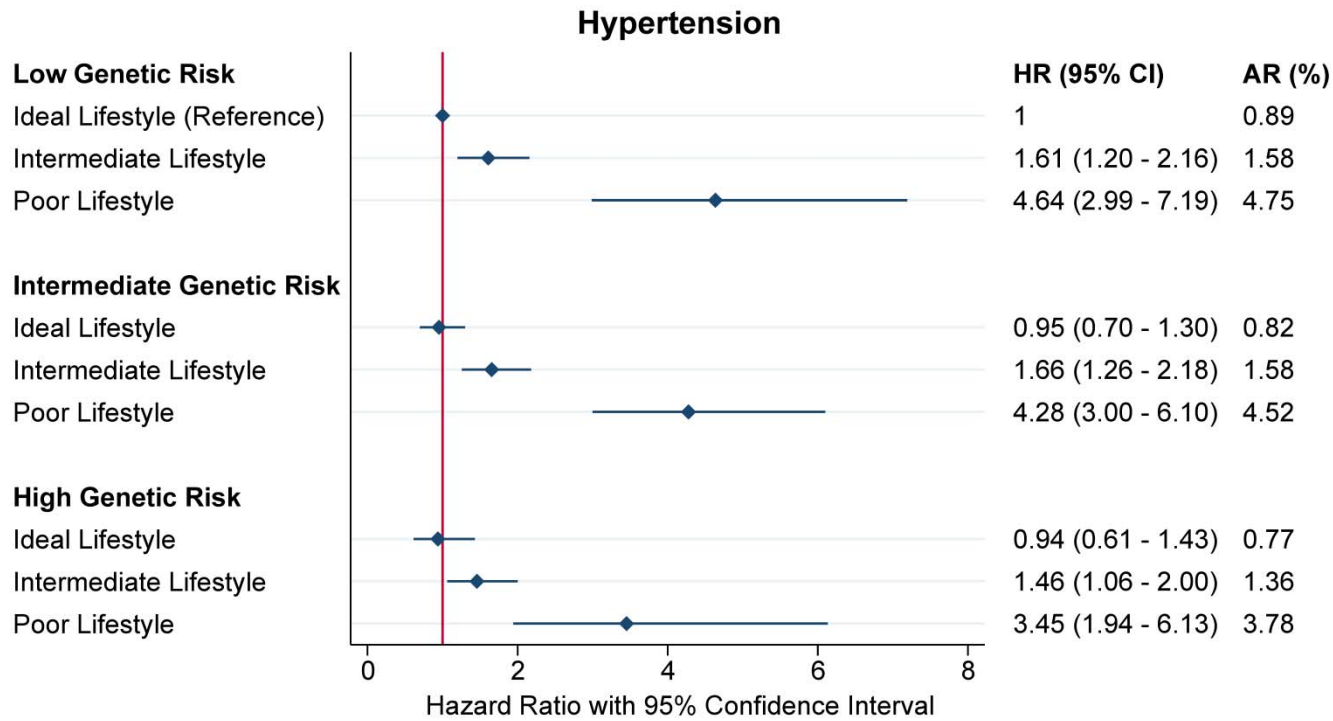

Hazard ratios (HR) with 95% confidence intervals and absolute risks (AR) are provided for new-onset hypertension in individuals with baseline systolic blood pressure (SBP) <130 and/or diastolic blood pressure (DBP) <80 mm Hg. A total of 87,741 individuals were included in the analyses, of which 1,255 (1.43%) developed hypertension

**eFigure 2.** Risk of incident coronary artery disease associated with genetic risk and lifestyle stratified by sex

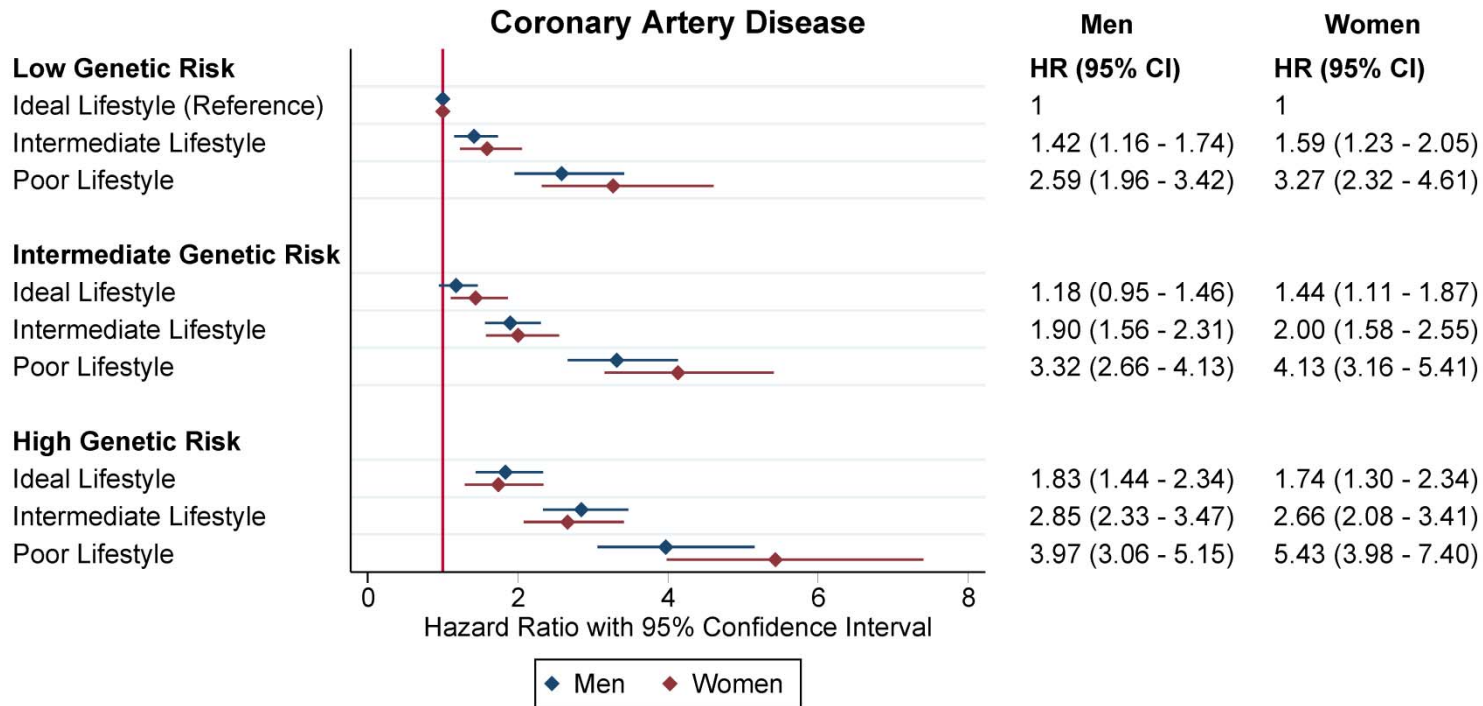

Shown are hazard ratios (HR) with 95% confidence intervals (95% CI) for men and women separately

**eFigure 3.** Risk of incident atrial fibrillation associated with genetic risk and lifestyle stratified by sex

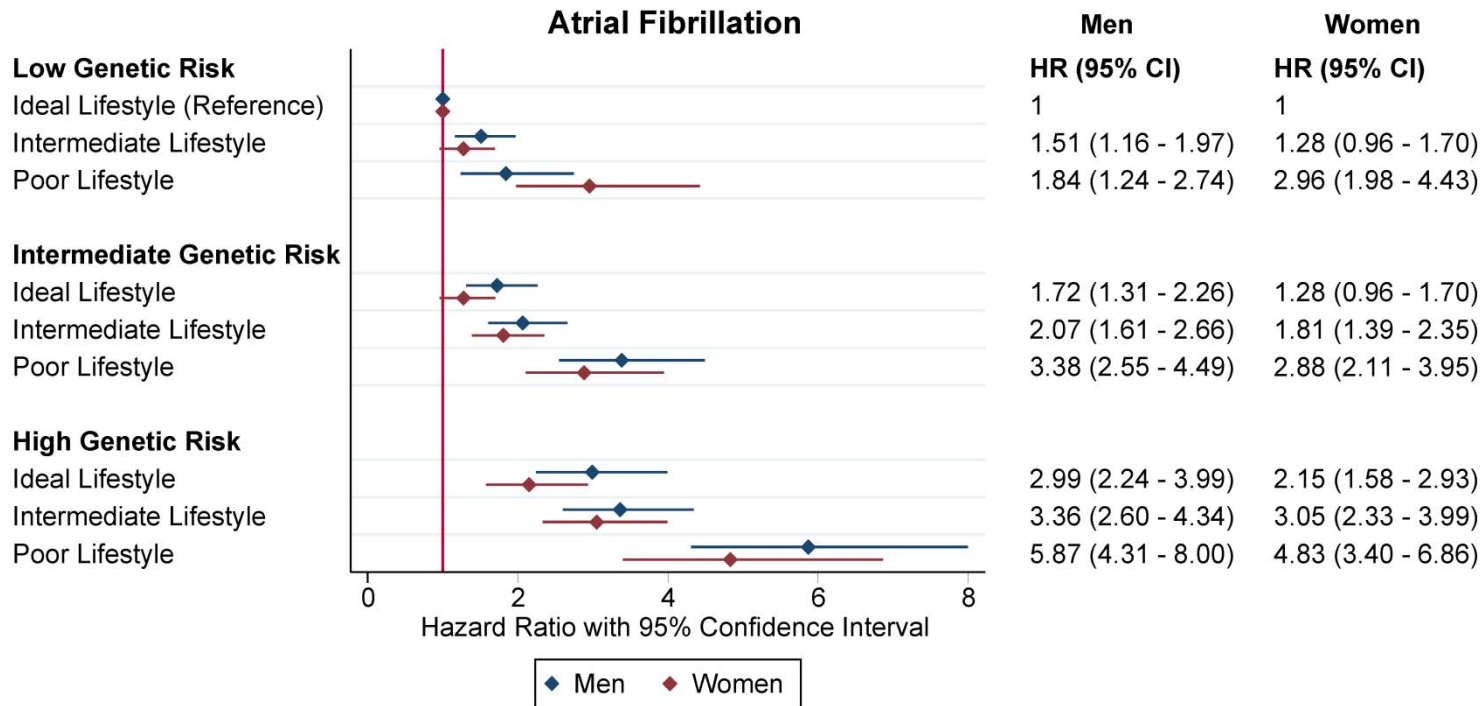

Shown are hazard ratios (HR) with 95% confidence intervals (95% CI) for men and women separately

**eFigure 4.** Risk of incident stroke associated with genetic risk and lifestyle stratified by sex

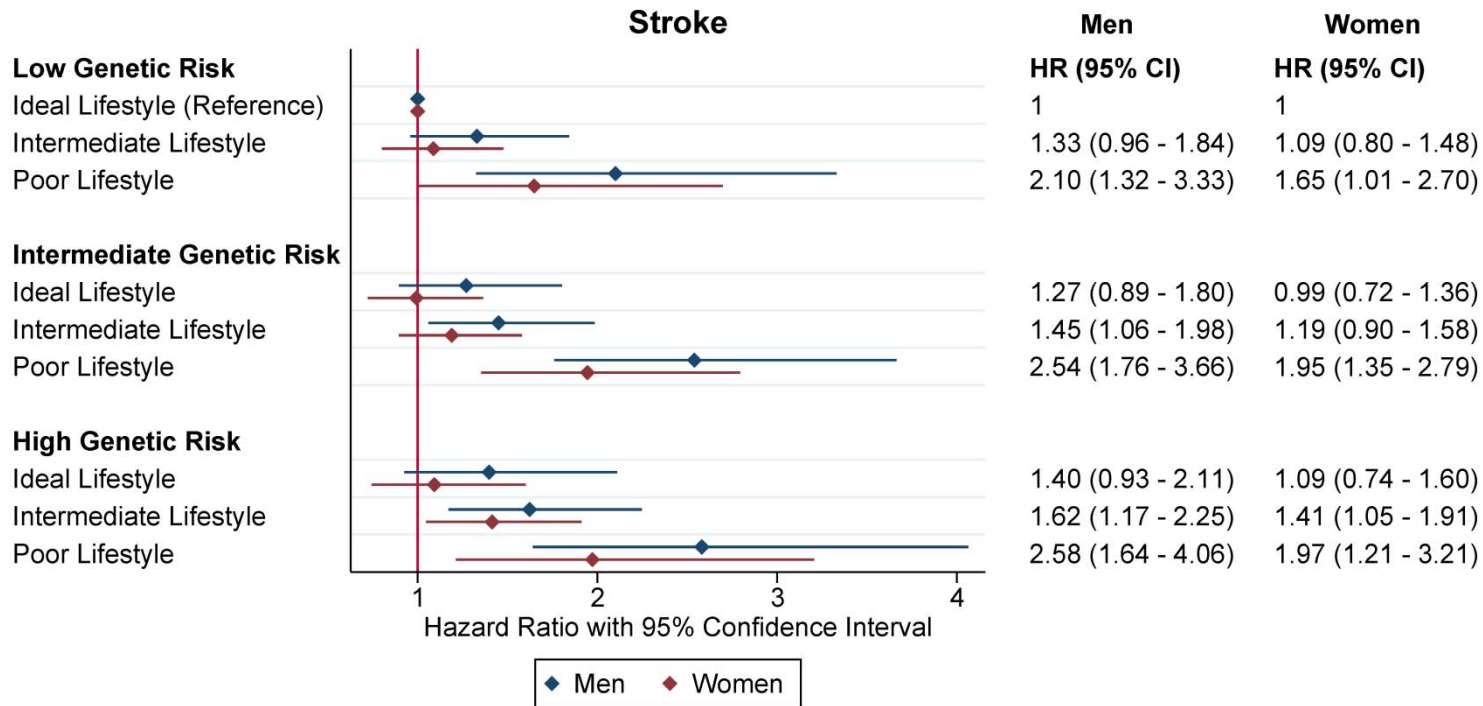

Shown are hazard ratios (HR) with 95% confidence intervals (95% CI) for men and women separately

**eFigure 5.** Risk of incident hypertension associated with genetic risk and lifestyle stratified by sex

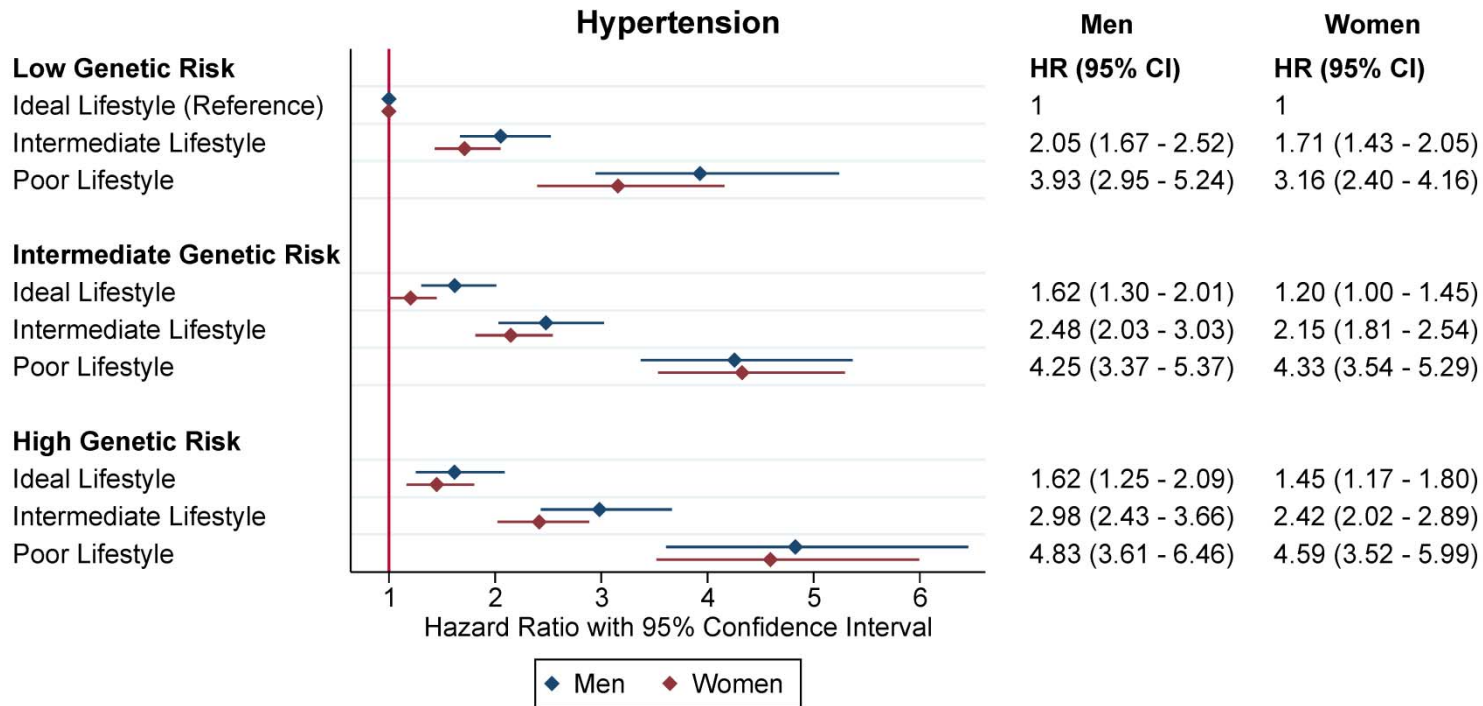

Shown are hazard ratios (HR) with 95% confidence intervals (95% CI) for men and women separately

**eFigure 6.** Risk of incident diabetes associated with genetic risk and lifestyle stratified by sex

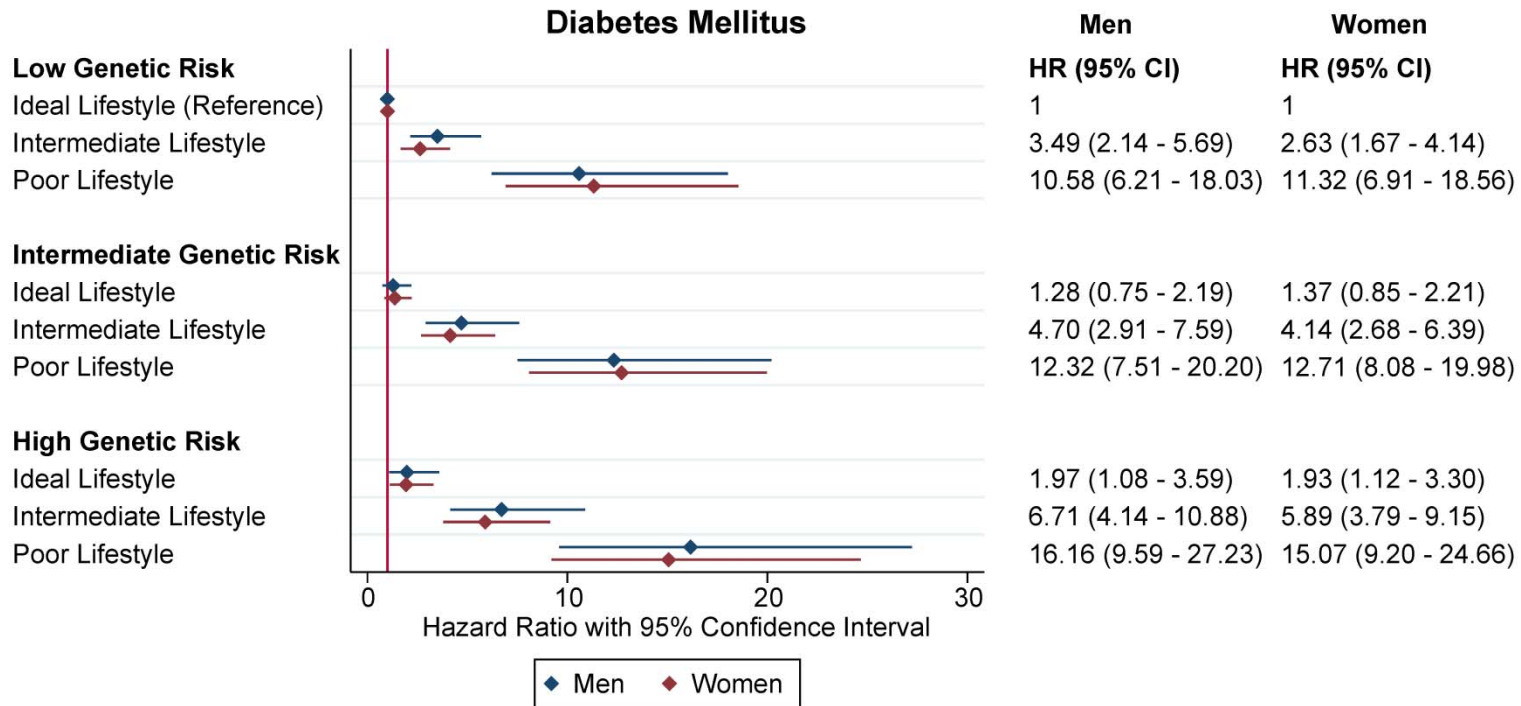

Shown are hazard ratios (HR) with 95% confidence intervals (95% CI) for men and women separately



## eReferences.

1. WHO. Obesity: preventing and managing the global epidemic. Report of a WHO consultation. *World Health Organ Tech Rep Ser.* 2000;894:i-xii, 1-253.
2. Craig CL, Marshall AL, Sjostrom M, et al. International physical activity questionnaire: 12-country reliability and validity. *Med Sci Sports Exerc.* 2003;35(8):1381-1395. doi: 10.1249/01.MSS.0000078924.61453.FB [doi].
3. Khera AV, Emdin CA, Drake I, et al. Genetic Risk, Adherence to a Healthy Lifestyle, and Coronary Disease. *N Engl J Med.* 2016;375(24):2349-2358. doi: 10.1056/NEJMoa1605086 [doi].
4. Mozaffarian D. Dietary and Policy Priorities for Cardiovascular Disease, Diabetes, and Obesity: A Comprehensive Review. *Circulation.* 2016;133(2):187-225. doi: 10.1161/CIRCULATIONAHA.115.018585 [doi].
5. Lloyd-Jones DM, Hong Y, Labarthe D, et al. Defining and setting national goals for cardiovascular health promotion and disease reduction: the American Heart Association's strategic Impact Goal through 2020 and beyond. *Circulation.* 2010;121(4):586-613. doi: 10.1161/CIRCULATIONAHA.109.192703 [doi].
